# Supplementary material for: Solvent-tuned discriminant sensing of Al3+, Mg2+and HF2−by vanilinyl-picolinyl hydrazide Schiff base
Source: Royal Society of Chemistry journal article supplement (doi:10.1039/c9nj00325h), 2019-01-01
Supplement: c9nj00325h1.pdf [file c9nj00325h1.pdf]

## Supplementary

### **Solvent tuned discriminant sensing of Al<sup>3+</sup>, Mg<sup>2+</sup> and HF<sub>2</sub><sup>-</sup> by vanilinylicolinylic hydrazide Schiff base**

Rakesh Purkait, Chittaranjan Sinha\*

Department of Chemistry, Jadavpur University, Kolkata 700 032, India,  
crsjuchem@gmail.com

## **Experimental Section**

### **Materials and methods**

All the required inorganic salts and organic chemicals of AR quality were obtained from Sigma-Aldrich and Merck, and used without further purification. Aqueous solutions of the required salts were prepared using Milli-Q water (Millipore). Perkin-Elmer 2400 Series-II CHN analyzer, Perkin Elmer, USA elemental analyser was used for elemental analyses. UV-vis spectra were taken from Perkin Elmer Lambda 25 spectrophotometer and fluorescence spectra were obtained by using a Perkin Elmer spectrofluorimeter model LS55; Fluorescence lifetime measurements were carried out by using time-correlated single photon counting set up from Horiba Jobin-Yvon; FT-IR spectra (KBr disk, 4000–400 cm<sup>-1</sup>) were collected from a Perkin Elmer LX-1 FTIR spectrophotometer. <sup>1</sup>H NMR spectra were obtained on a Bruker (AC) 300 MHz FT-NMR spectrometer and TMS is used as an internal standard. ESI mass spectra were recorded from a Water HRMS model XEVO-G2QTOF#YCA351 spectrometer. All of the required experimental measurements were conducted at room temperature.

### **Synthesis of HVPPh**

Picolino hydrazide was prepared from Picolinic acid. With continuous stirring to the MeOH (7 ml) solution of Picolino hydrazide (137.13 mg, 1.0 mmol), 2-hydroxy-4-methoxybenzaldehyde (152.14 mg, 1.0 mmol) in methanol solution (7 ml) was added drop-by-drop

and stirring was continued for 8 h. Then the resultant clear solution was kept and allowed for slow evaporation, crystalline product was obtained after two weeks in 94% yield. Pyridine-2-carboxylic acid (2-hydroxy-4-methoxy-benzylidene)-hydrazide (**HVPh**) : M.P.>200 °C. The mass spectrum displays an ion peak at 272.1420 for [**HVPh**+H]<sup>+</sup> and a base peak at 294.1283 which corresponds the formation of [**HVPh** +Na]<sup>+</sup> (**Fig. S1**); Microanalytical data: C<sub>14</sub>H<sub>13</sub>N<sub>3</sub>O<sub>3</sub> calcd (found): C, 61.99 (61.81); H, 4.83 (4.90); N, 15.49 (14.58); %. <sup>1</sup>H NMR (300 MHz, DMSO-d<sub>6</sub>): δ12.39 (s, 1H, NH), 11.74 (s, 1H, OH), 8.74 (s, 1H, imine-H), 8.72 (d, 1H, Pyridine), 8.14-8.03 (m, 2H, pyridine), 7.69-7.65 (m, 1H, pyridine), 7.34 (d, 1H, vaniline), 6.54 (d, 1H, vaniline), 6.50 (t, 1H, vaniline), 3.78 (s, 1H, OCH<sub>3</sub>) (**Fig. S2**); IR: 3461 cm<sup>-1</sup> (phenolic-OH), 3467 cm<sup>-1</sup> (hydrazide -NH), 1664 cm<sup>-1</sup> (imines C=N). (**Fig. S3**).

#### **UV–Vis and fluorescence spectral studies**

The stock solution of **HVPh** ( $1 \times 10^{-3}$  mol L<sup>-1</sup>) was prepared in DMSO. For the fluorescence and UV-Visible spectral study, the solution of **HVPh** was diluted to  $20 \times 10^{-6}$  mol L<sup>-1</sup> with DMSO and Water. For UV-vis and fluorescence experiments, the test samples were prepared by placing appropriate amounts of the stock solution of the respective cations into 2.0 mL of the probe solution. For fluorescence measurements, the excitation was provided at 340 nm, and emission was acquired from 370 nm to 660 nm (excitation slit = 15.0 and emission slit = 5.0). Spectral data were taken within 10 seconds after addition of the ions.

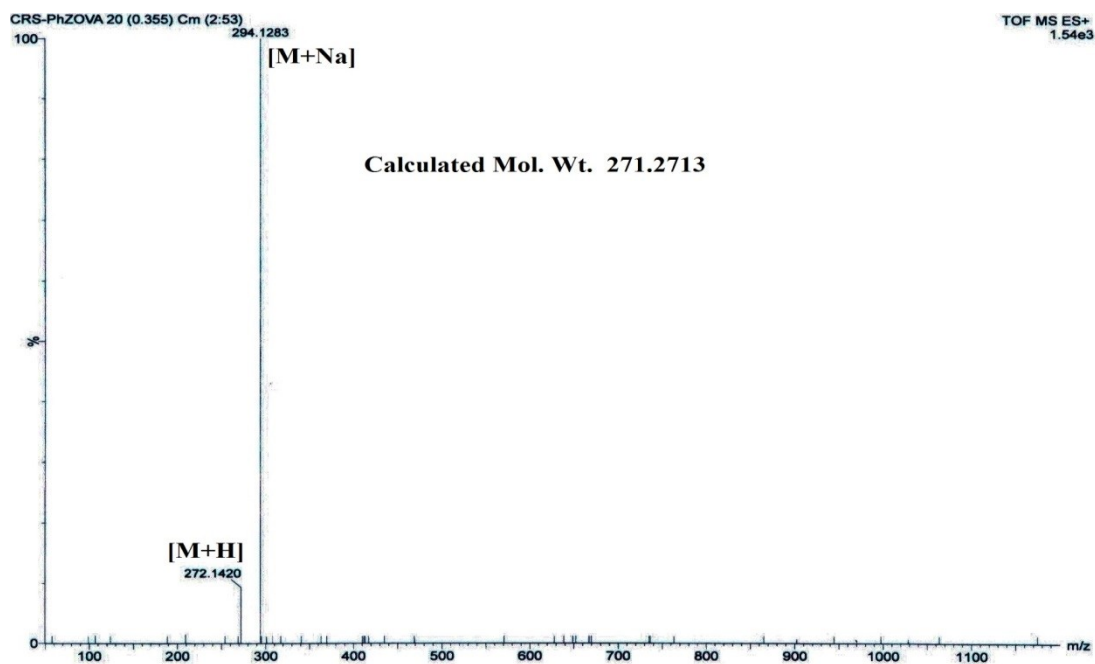

Fig S1 Mass spectrum of HVPPh

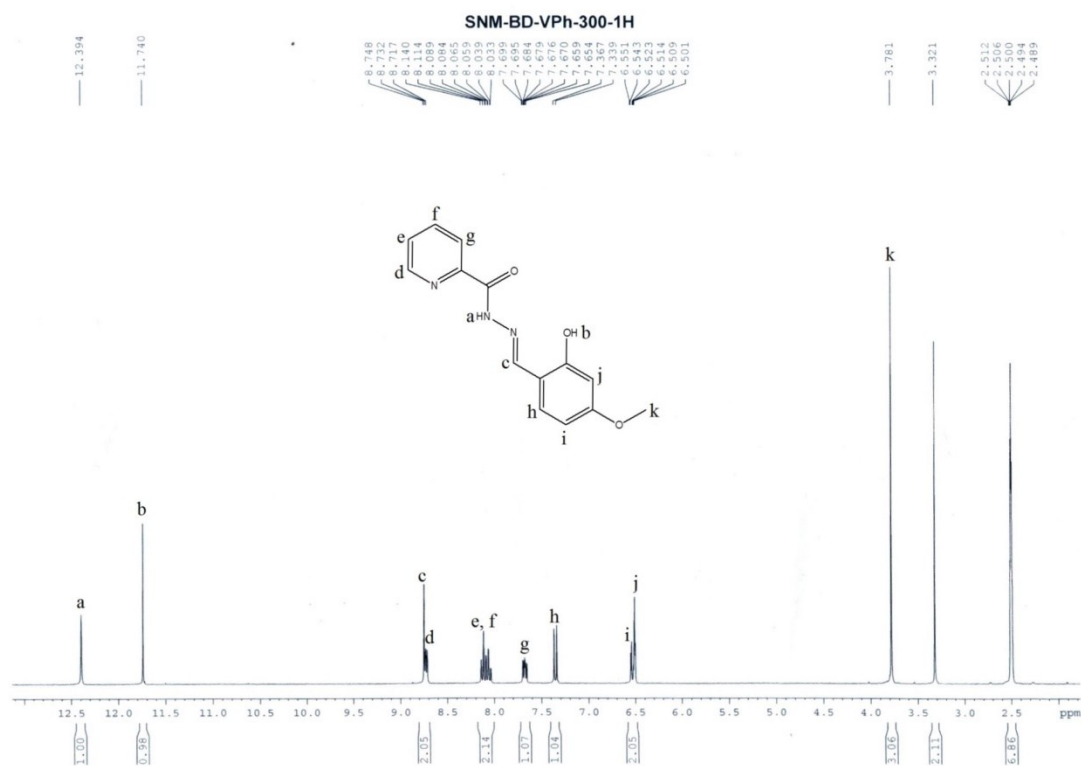

Fig S2  $^1\text{H}$  NMR of HVPPh in  $\text{DMSO-d}_6$

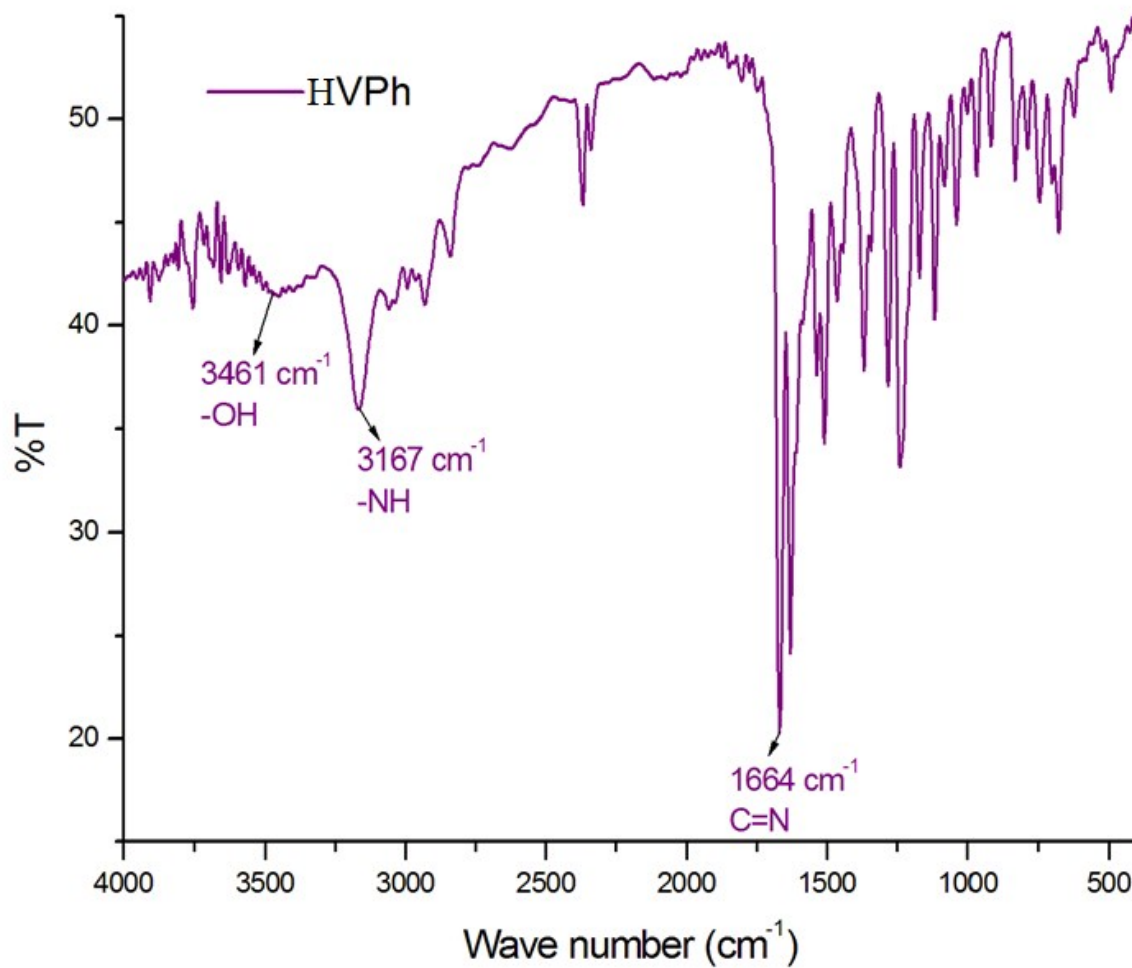

**Fig S3** IR spectrum of **HVPPh** in KBr disk.

**Table S1** Single Crystal X-ray diffraction data of **HVPPh**

|                   |                                                               |
|-------------------|---------------------------------------------------------------|
| Empirical formula | C <sub>14</sub> H <sub>13</sub> N <sub>3</sub> O <sub>3</sub> |
| Formula weight    | 271.27                                                        |
| Temperature (K)   | 296(2)                                                        |
| System            | triclinic                                                     |
| Space group       | P -1                                                          |
| a (Å)             | 13.956(9)                                                     |
| b (Å)             | 15.246(7)                                                     |

|                                                |               |
|------------------------------------------------|---------------|
| c (Å)                                          | 15.246(7)     |
| $\alpha/^\circ$                                | 77.91         |
| $\beta/^\circ$                                 | 62.76         |
| $\gamma/^\circ$                                | 62.76         |
| V (Å) <sup>3</sup>                             | 2564(2)       |
| Z                                              | 8             |
| Dc/g cm <sup>-3</sup>                          | 1.406         |
| $\mu/\text{mm}^{-1}$                           | 0.102         |
| $\theta$ range/ $^\circ$                       | 1.502– 24.998 |
| F(000)                                         | 1136.0        |
| Refine parameters                              | 730           |
| Total reflections                              | 7516          |
| R <sub>1</sub> <sup>a</sup> [I>2 $\sigma$ (I)] | 0.1076        |
| wR <sub>2</sub> <sup>b</sup>                   | 0.3265        |
| GOF <sup>c</sup>                               | 0.915         |

<sup>a</sup>R<sub>1</sub> =  $\Sigma||F_o| - |F_c|| / \Sigma|F_o|$ ; <sup>b</sup>wR<sub>2</sub> =  $\{\Sigma[w(F_o^2 - F_c^2)^2] / \Sigma[w(F_o^2)^2]\}^{1/2}$ ;  $w = [\sigma^2(F_o)^2 + (0.1003P)^2 + 4.9693P]^{-1}$  (F<sub>o</sub><sup>2</sup> + 2F<sub>c</sub><sup>2</sup>)/3; <sup>c</sup> Goodness-of-fit

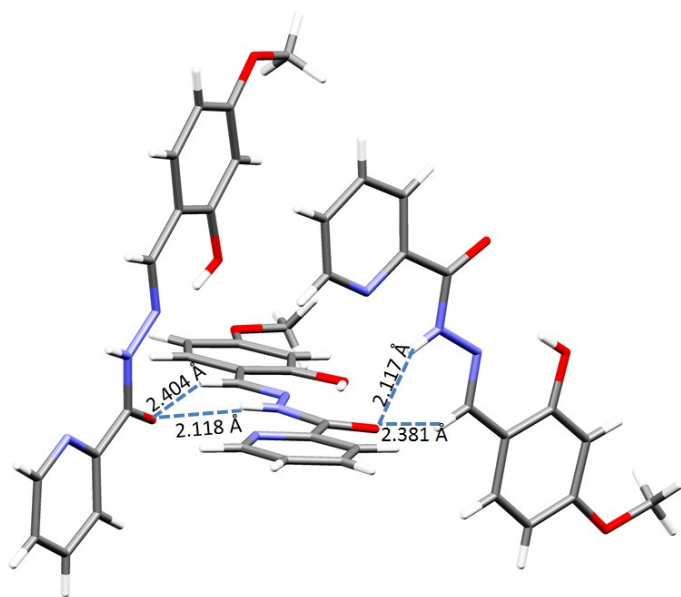

**Fig S4** Inter-molecular H-bonding in **HVPh**

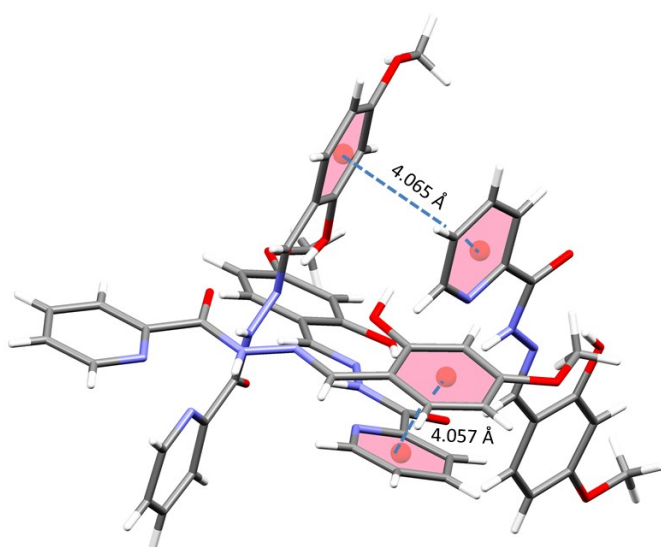

**Fig S5** Inter-molecular  $\pi$ ... $\pi$  stacking in **HVPh**

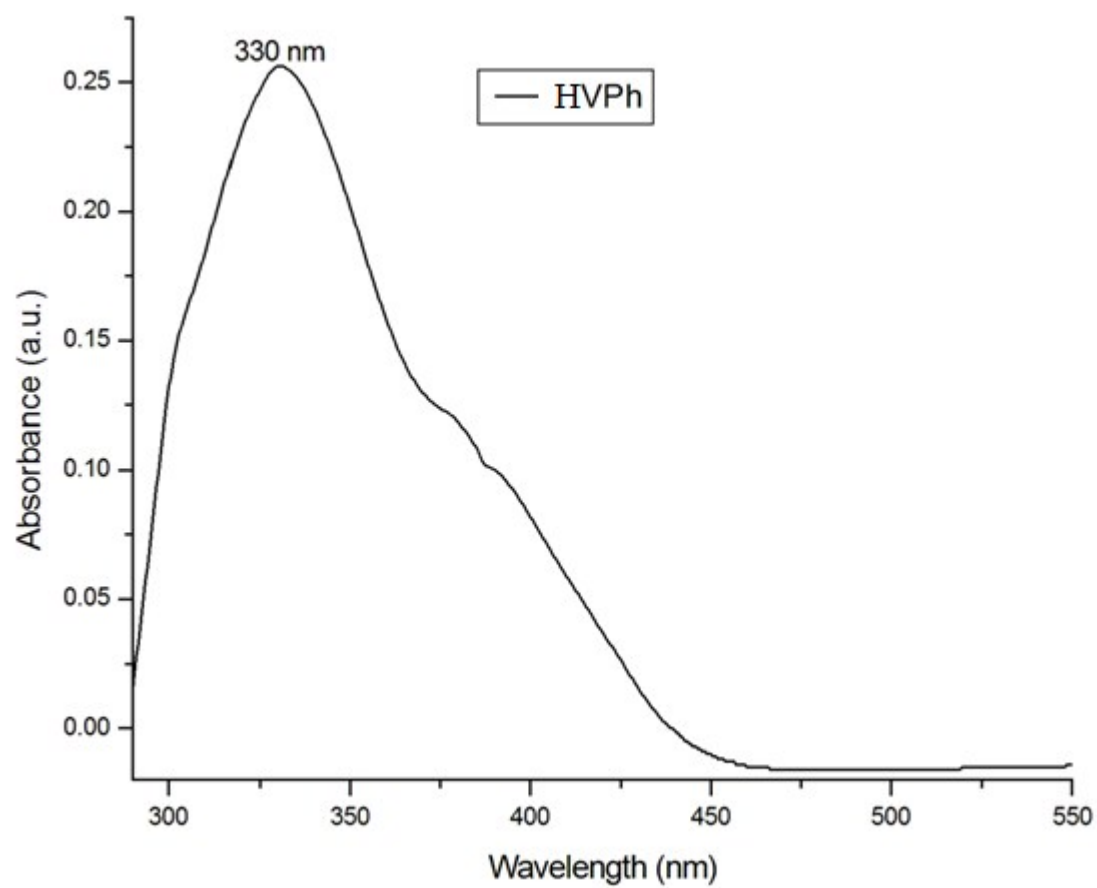

**Fig S6** UV-vis spectrum of **HVPh** in Water medium.

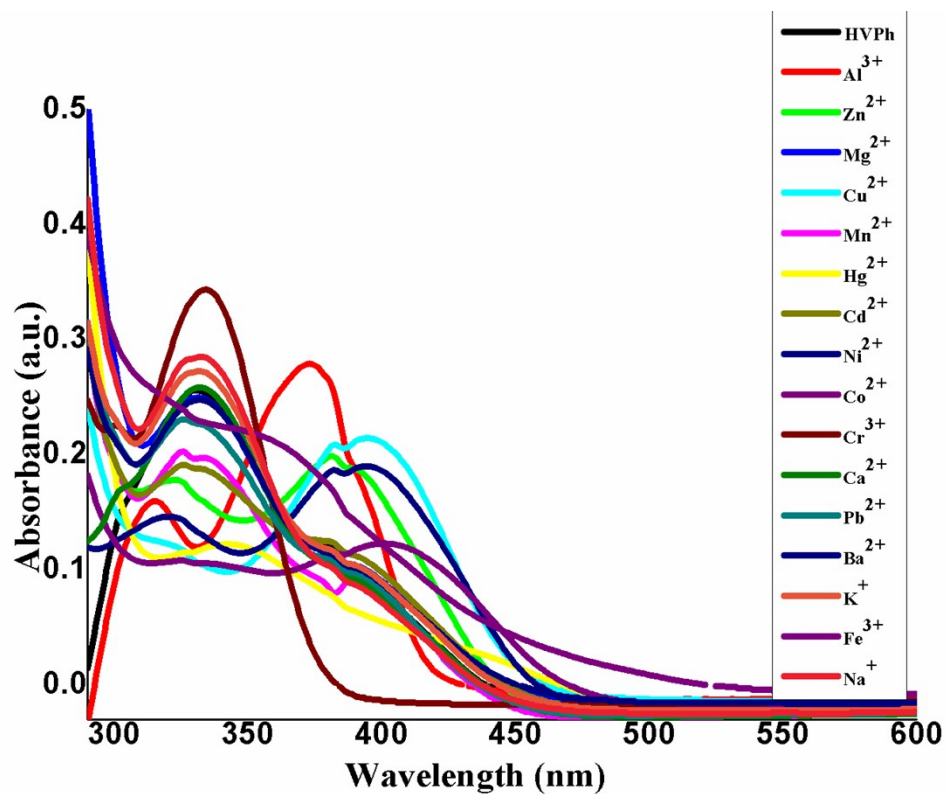

Fig S7 UV-vis spectra of HVPPh upon addition of various metal ions in water medium.

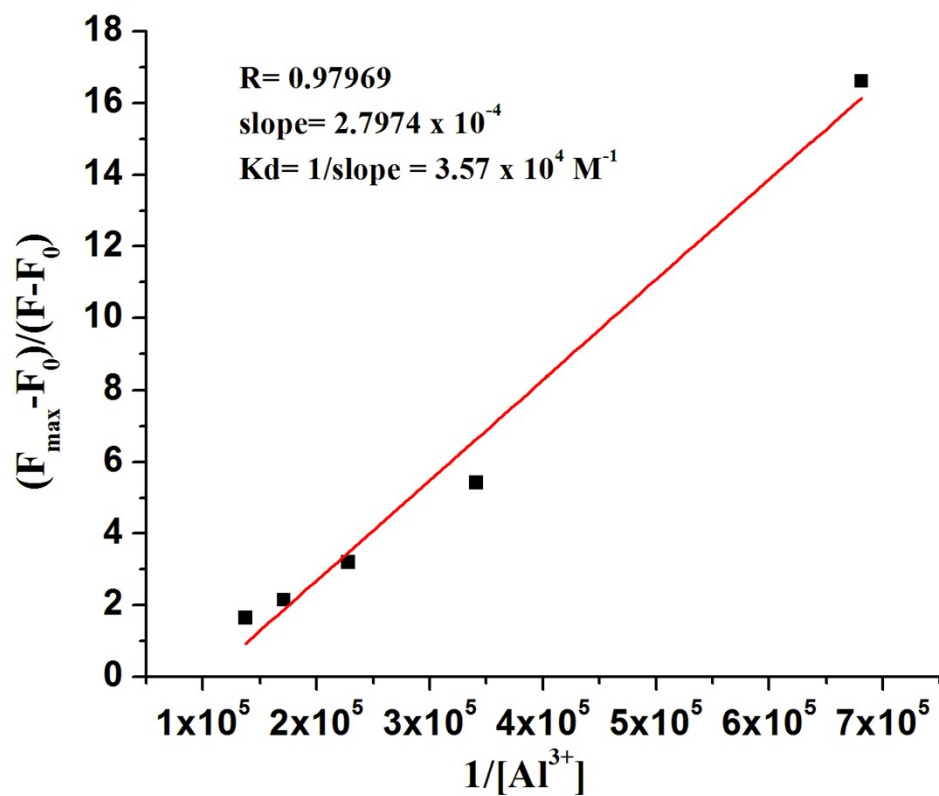



(a)

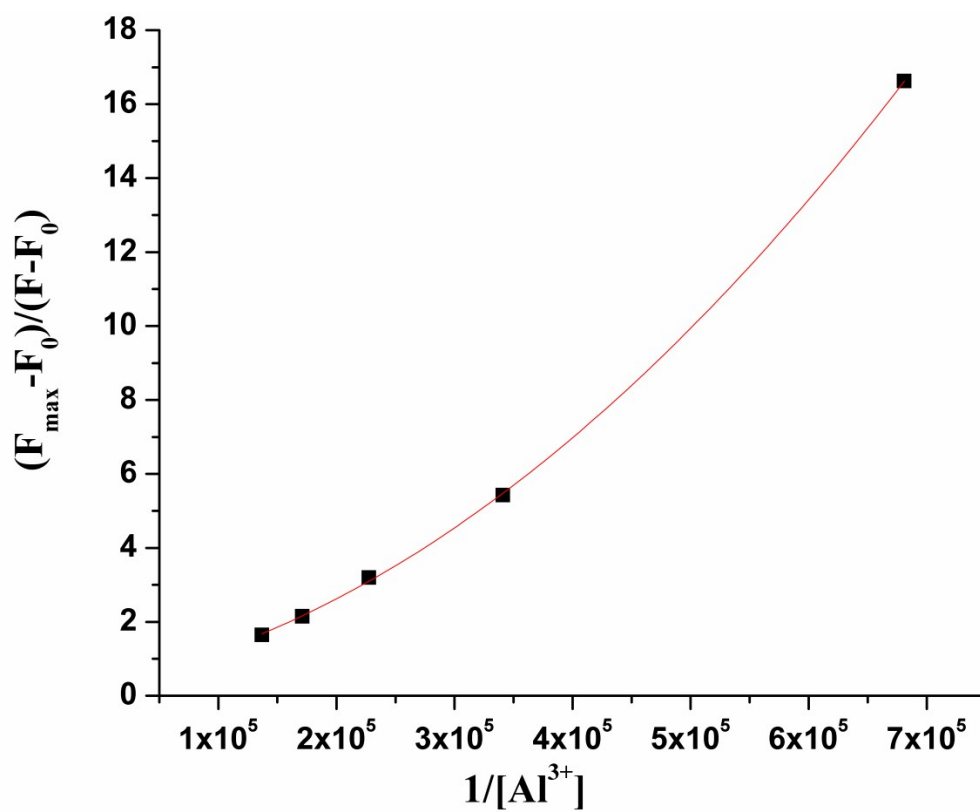

(b)

**Fig S8** Fluorescence titration determine binding constant using Benesi-Hildebrand method for  $Al^{3+}$  [(a) Linear fitting; (b) Non-linear fitting]

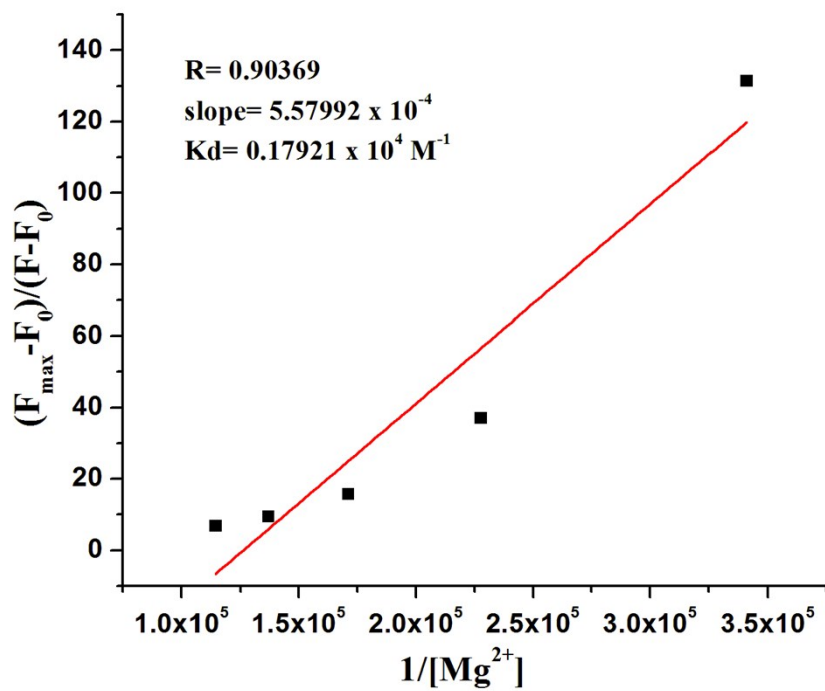

(a)

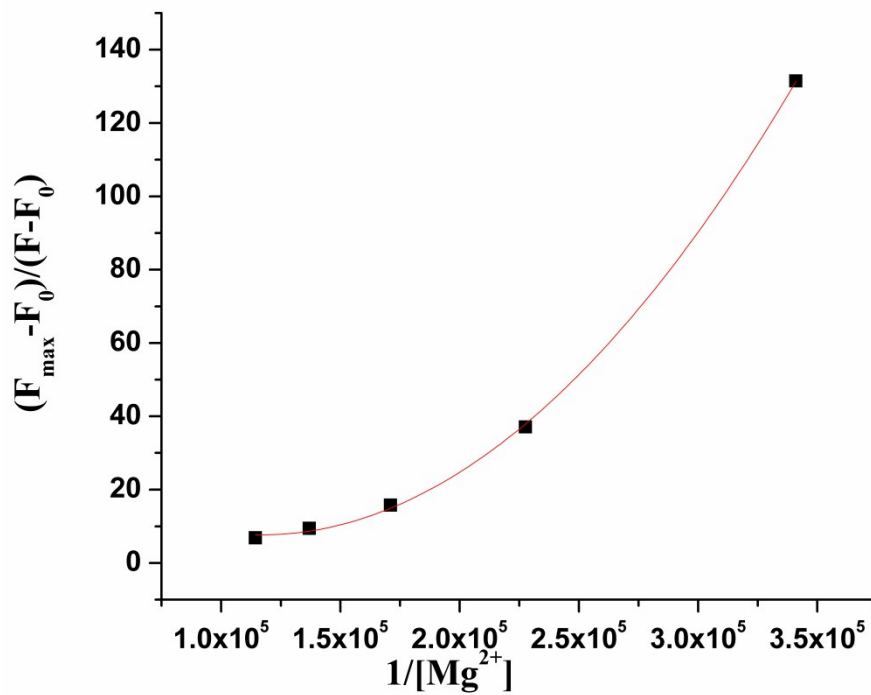

(b)

**Fig S9** Fluorescence titration determines binding constant using Benesi-Hildebrand method for  $\text{Mg}^{2+}$  [(a) Linear fitting; (b) Non-linear fitting]

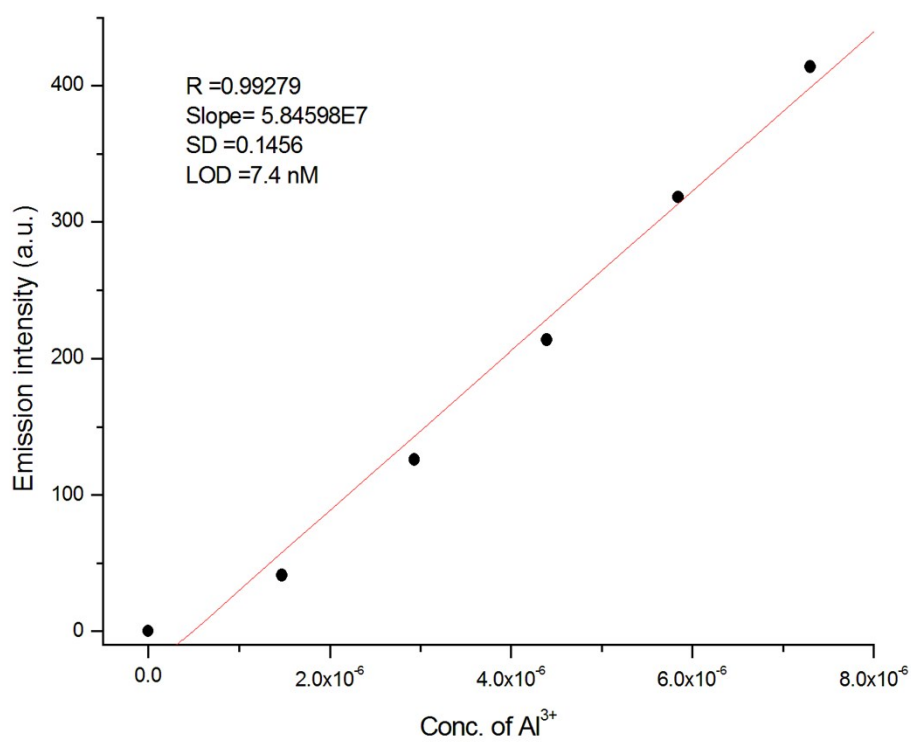

**Fig S10** Calculation of limit of detection (LOD) for  $\text{Al}^{3+}$

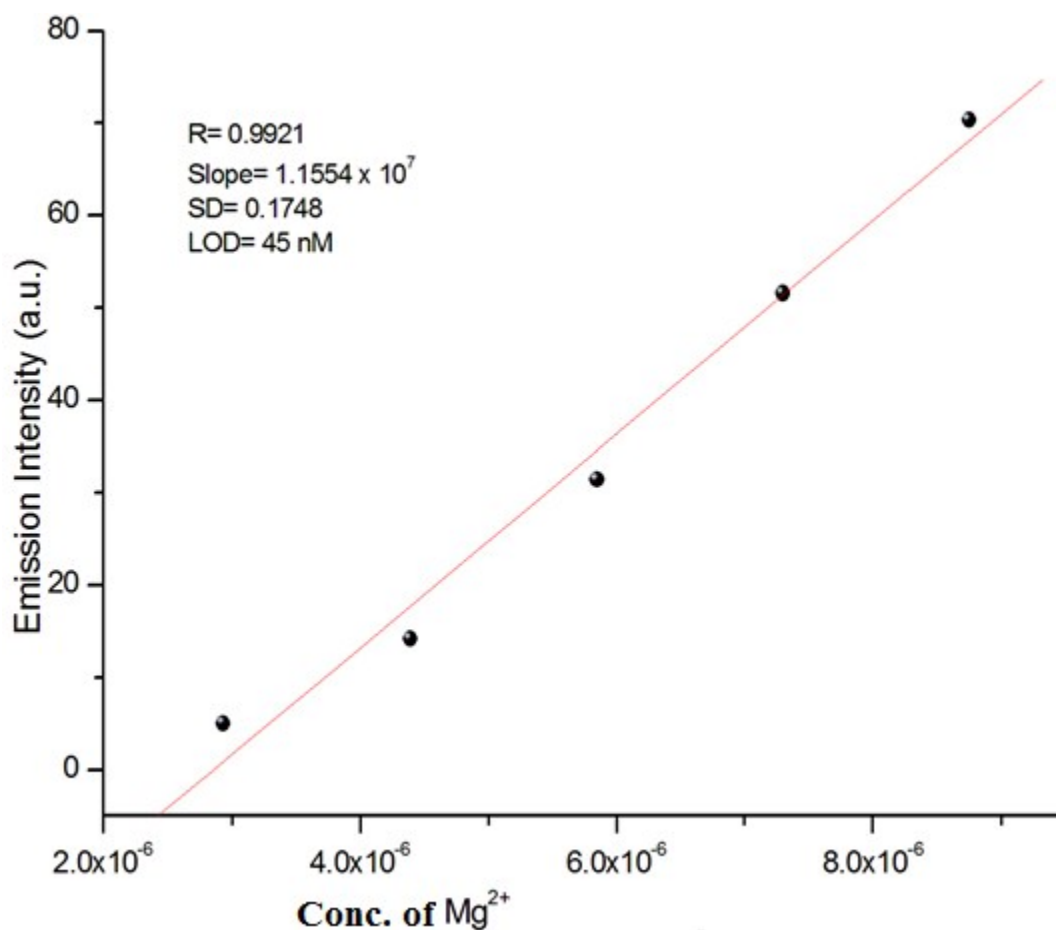

Fig S11 Calculation of limit of detection (LOD) for  $\text{Mg}^{2+}$

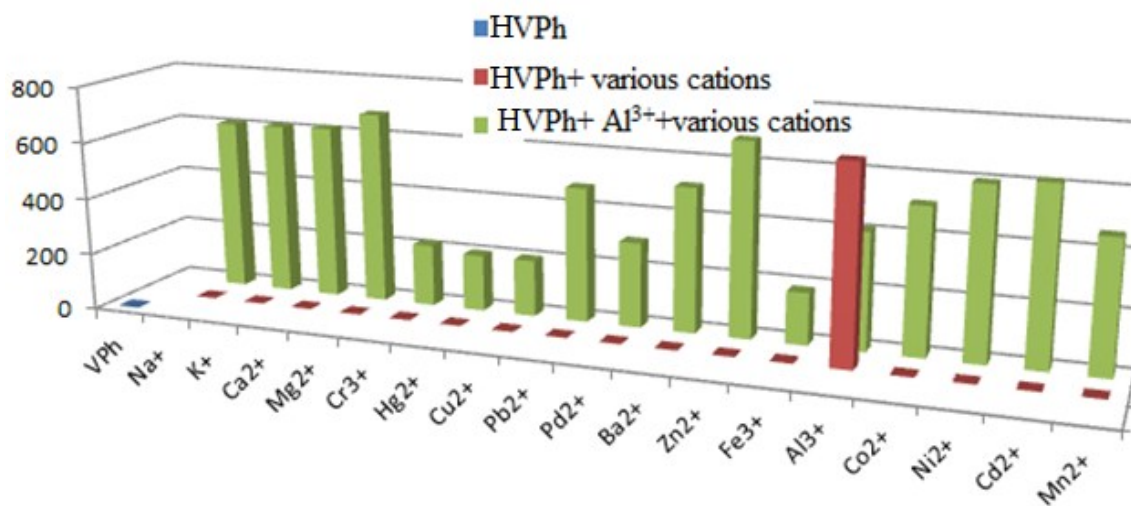

Fig S12 Studies of interference by various metal ions on  $\text{Al}^{3+}$  sensitivity

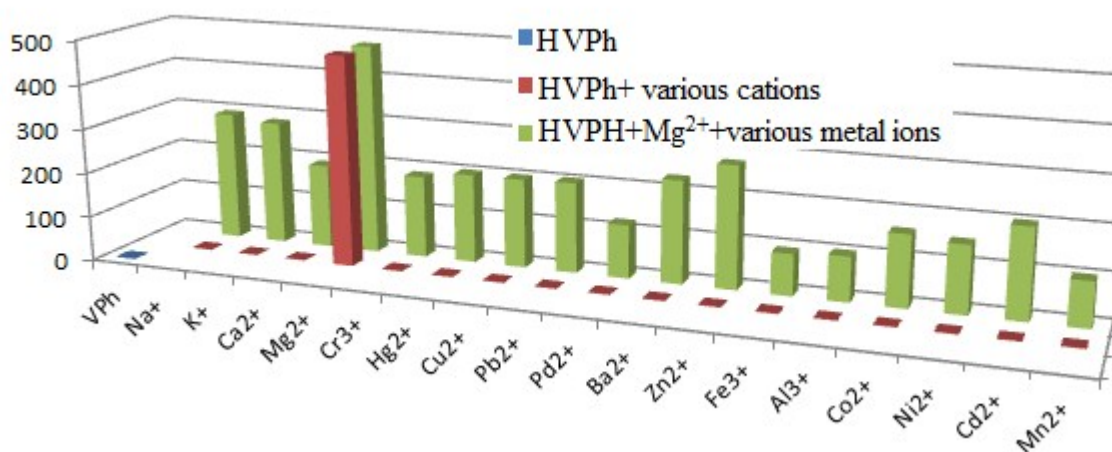

**Fig S13** Studies of interference by various metal ions on Mg<sup>2+</sup> sensitivity

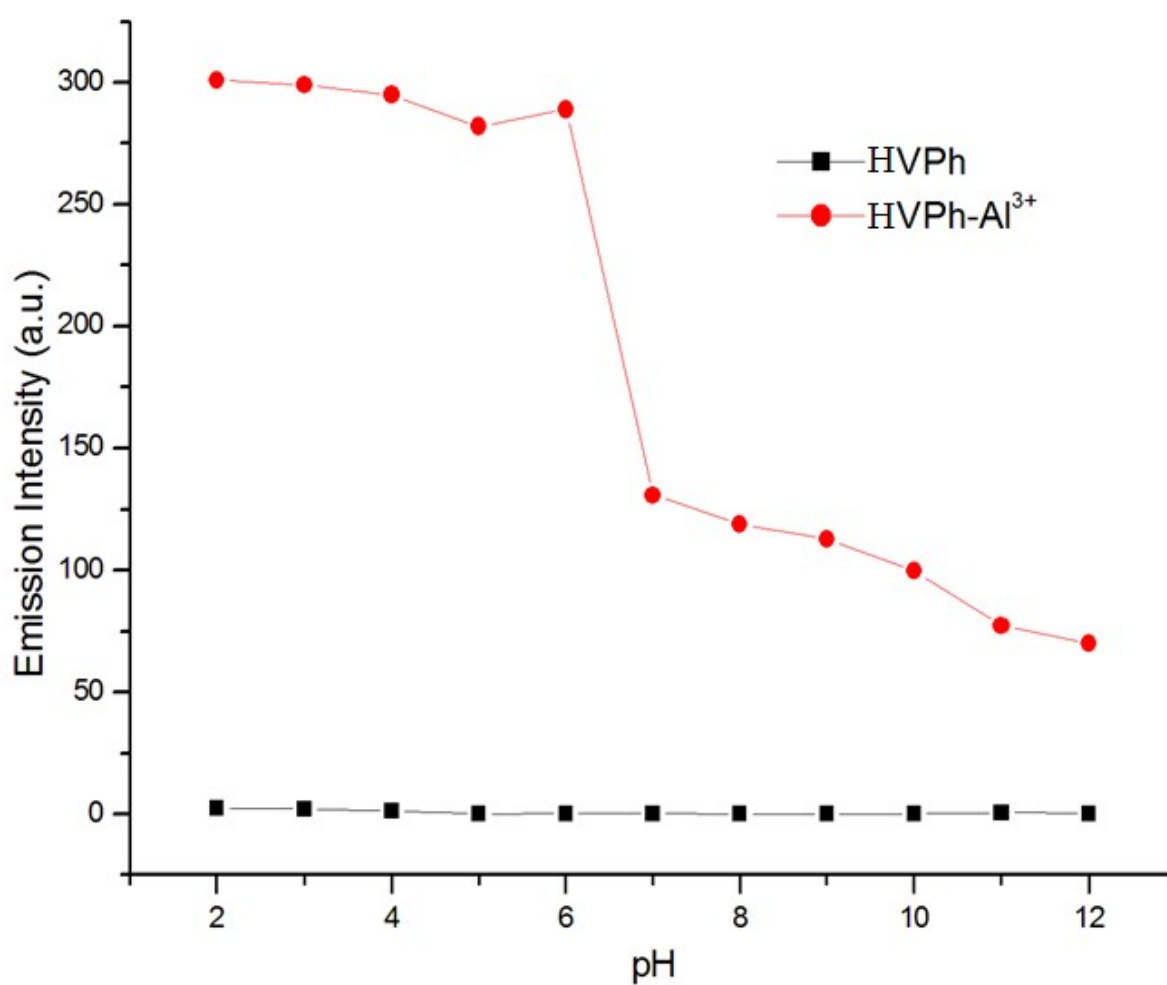

**Fig S14** pH variation sensitivity of HVPPh towards Al<sup>3+</sup>

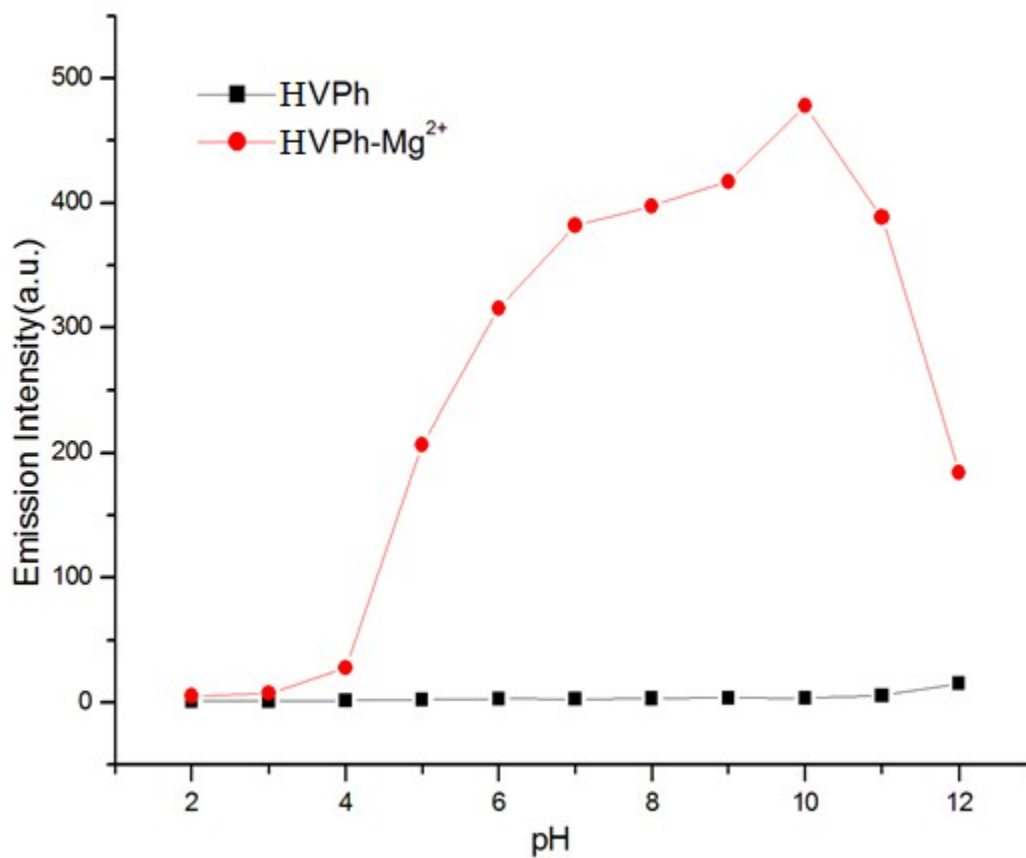

**Fig S15** pH variation sensitivity of **HVPPh** towards  $Mg^{2+}$

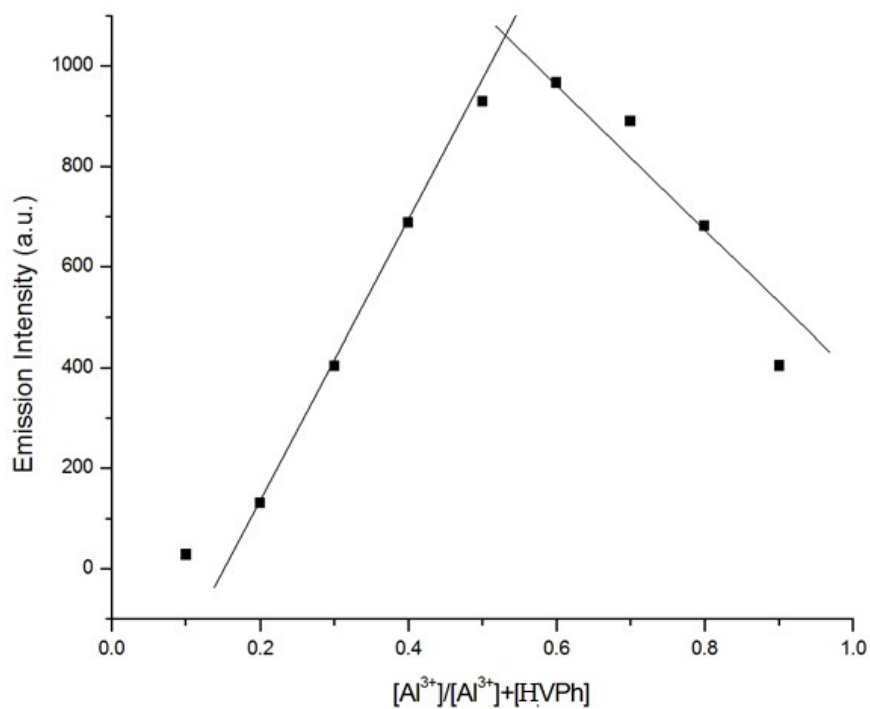

**Fig S16** Job's plot for Al<sup>3+</sup> by fluorescence spectroscopy

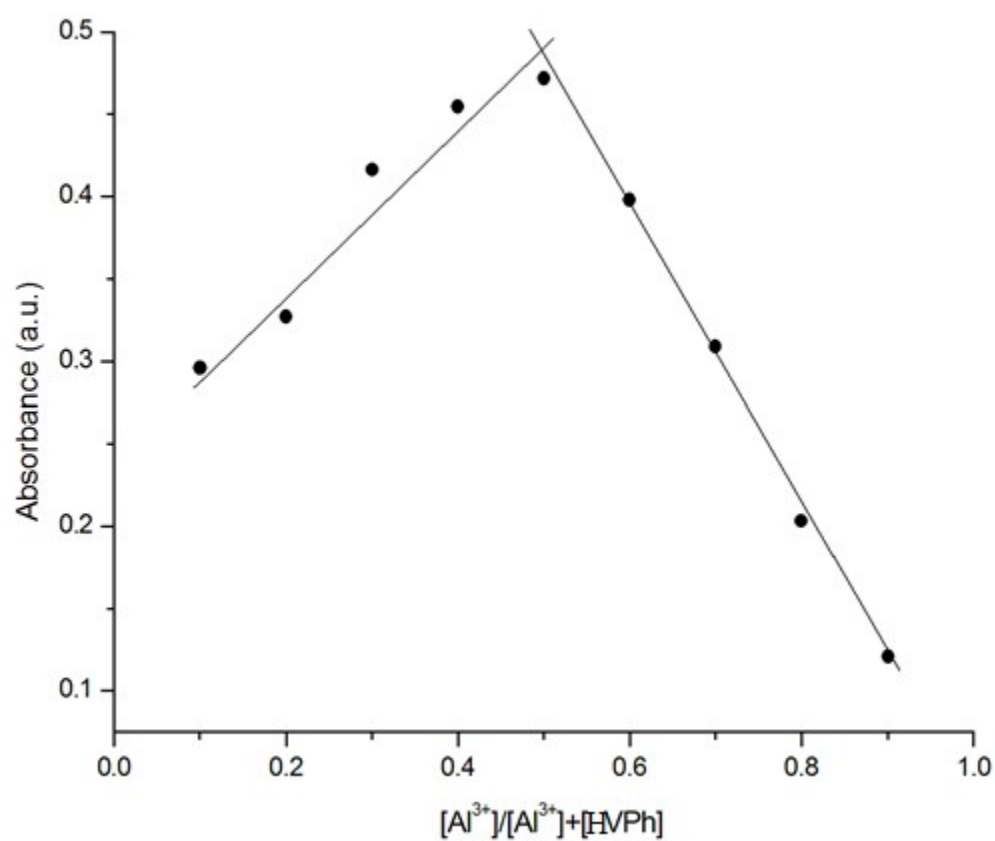

**Fig S17** Job's plot for Al<sup>3+</sup> by UV-vis spectroscopy

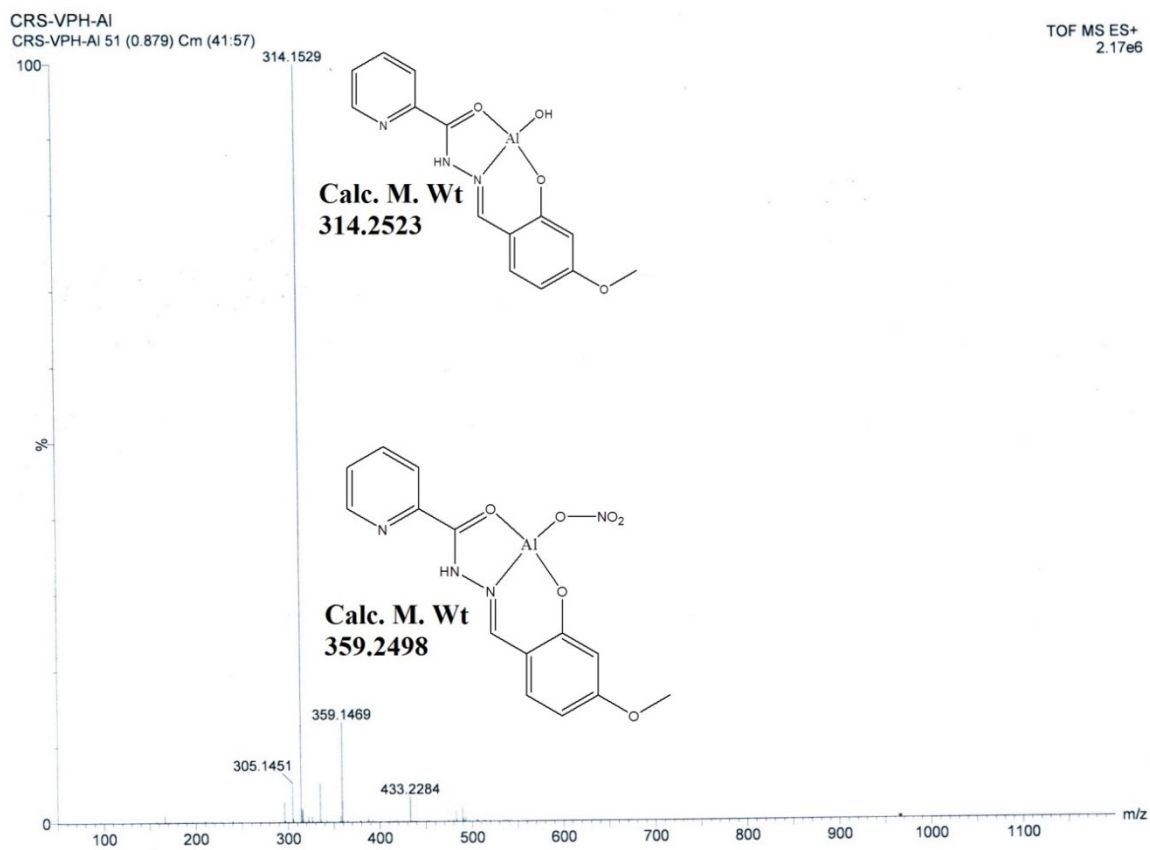

**Fig S18** Mass spectra of **HVPPh-Al** complex



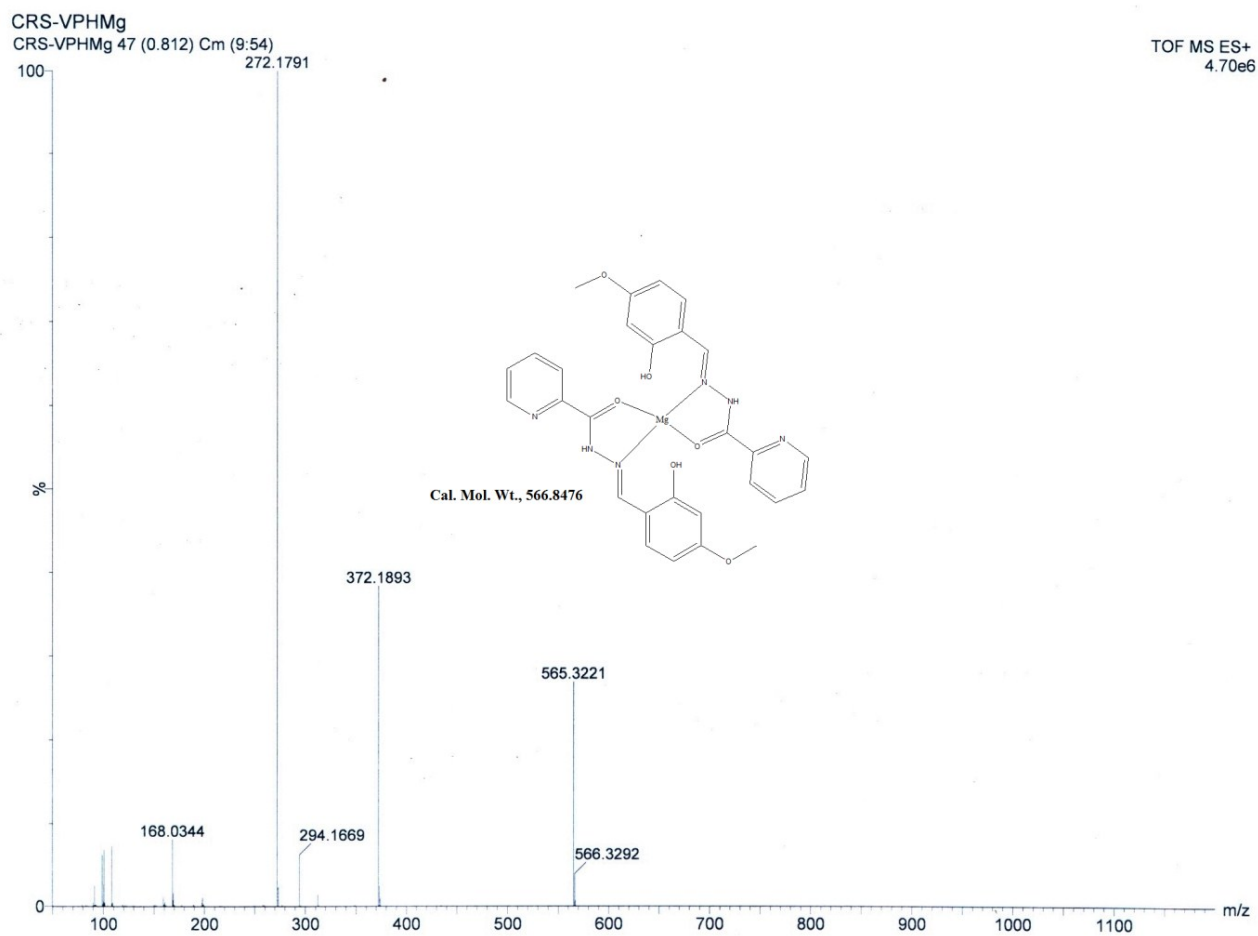

**Fig S19** Mass spectra of **HVPh-Mg** complex

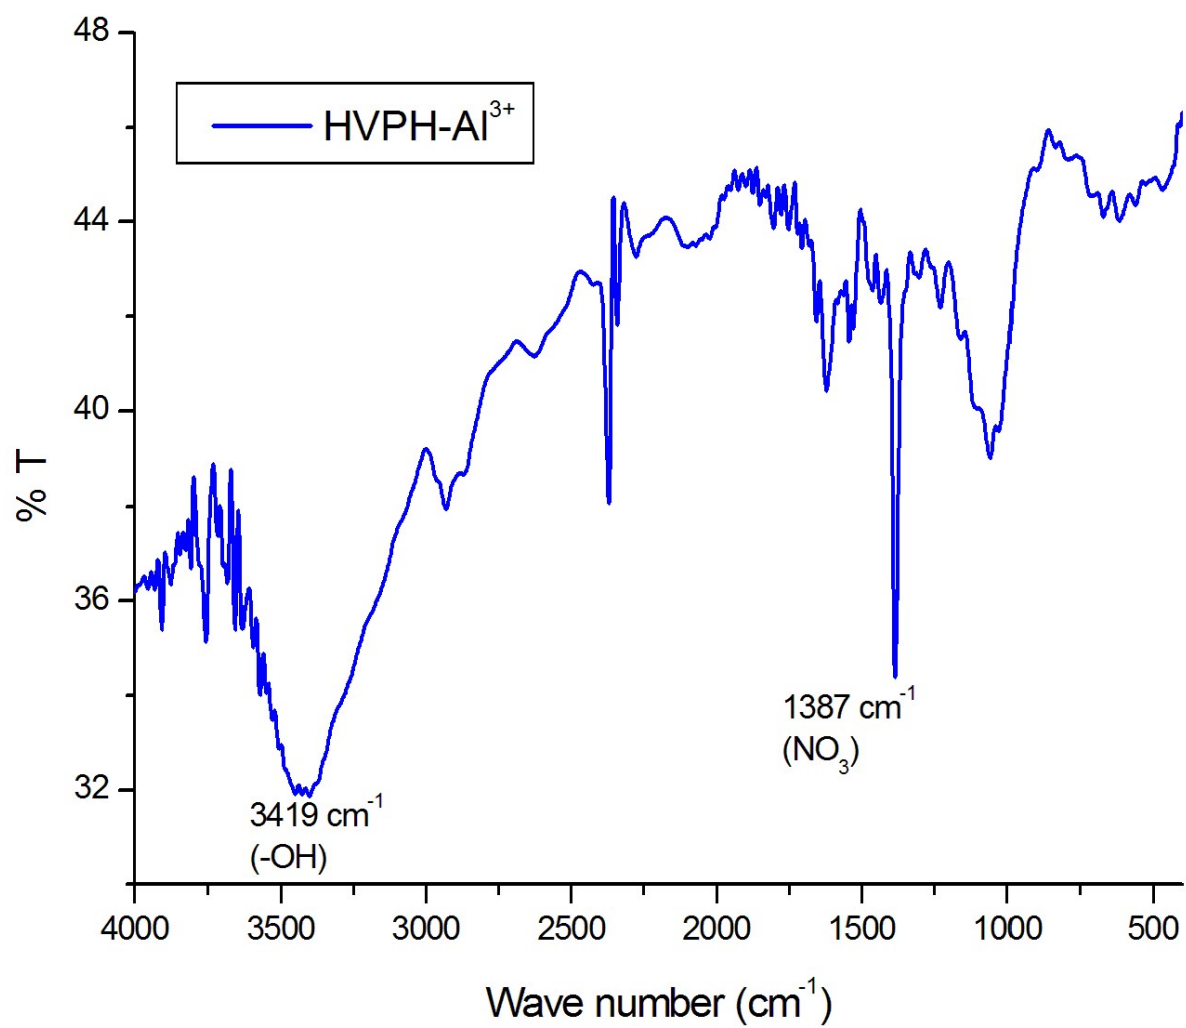

**Fig S20** IR spectrum of **HVPH-Al** complex in KBr disk

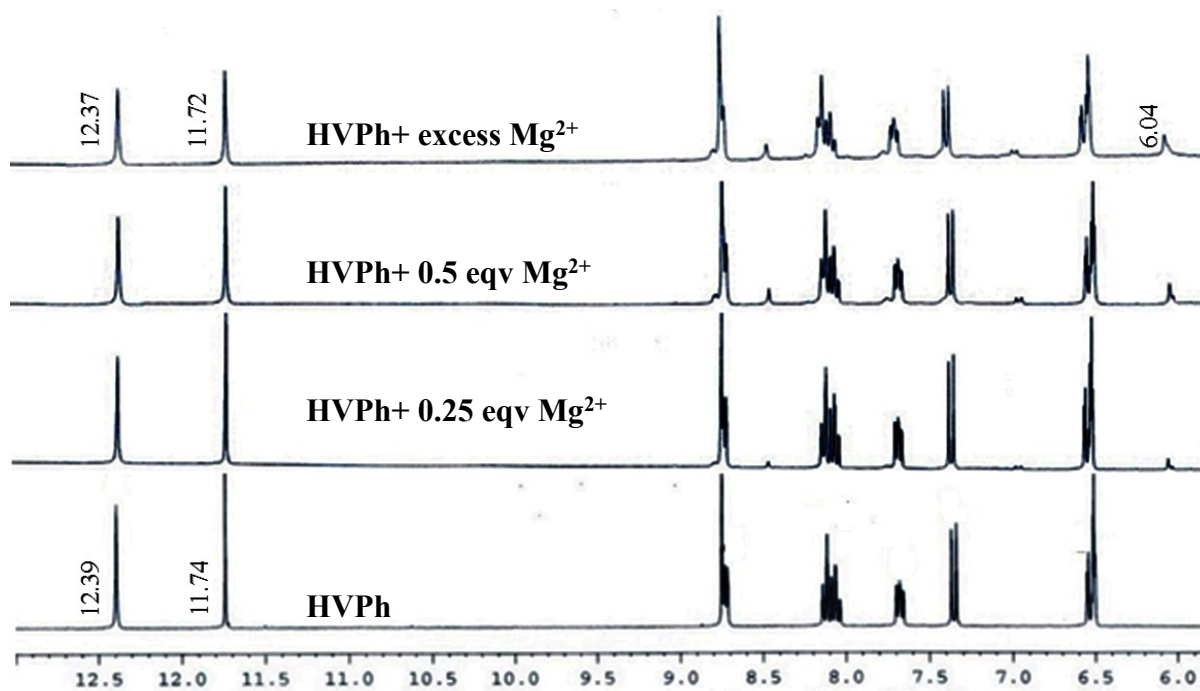

**Fig S21**  $^1\text{H}$  NMR spectra of HVPPh in  $\text{DMSO-d}_6$  on gradual addition of  $\text{Mg}^{2+}$  salt.

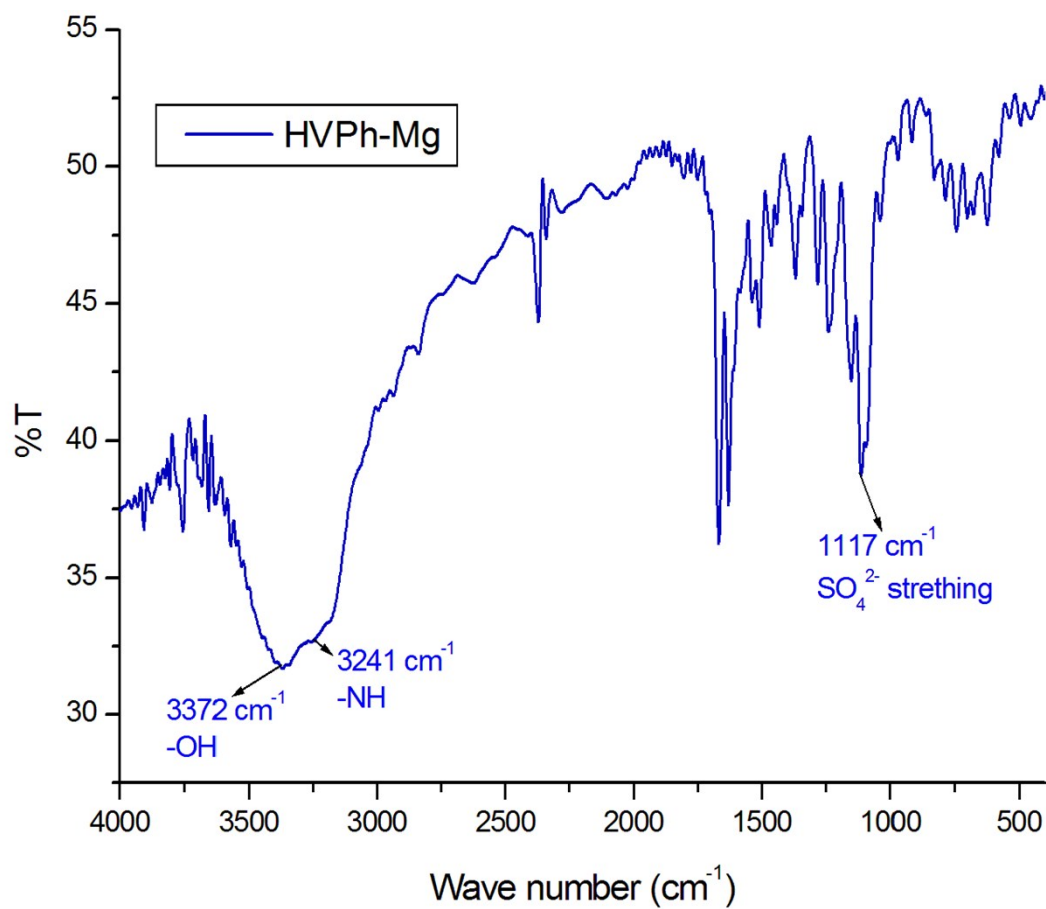

**Fig S22** IR spectrum of HVPPh-Mg in KBr disk

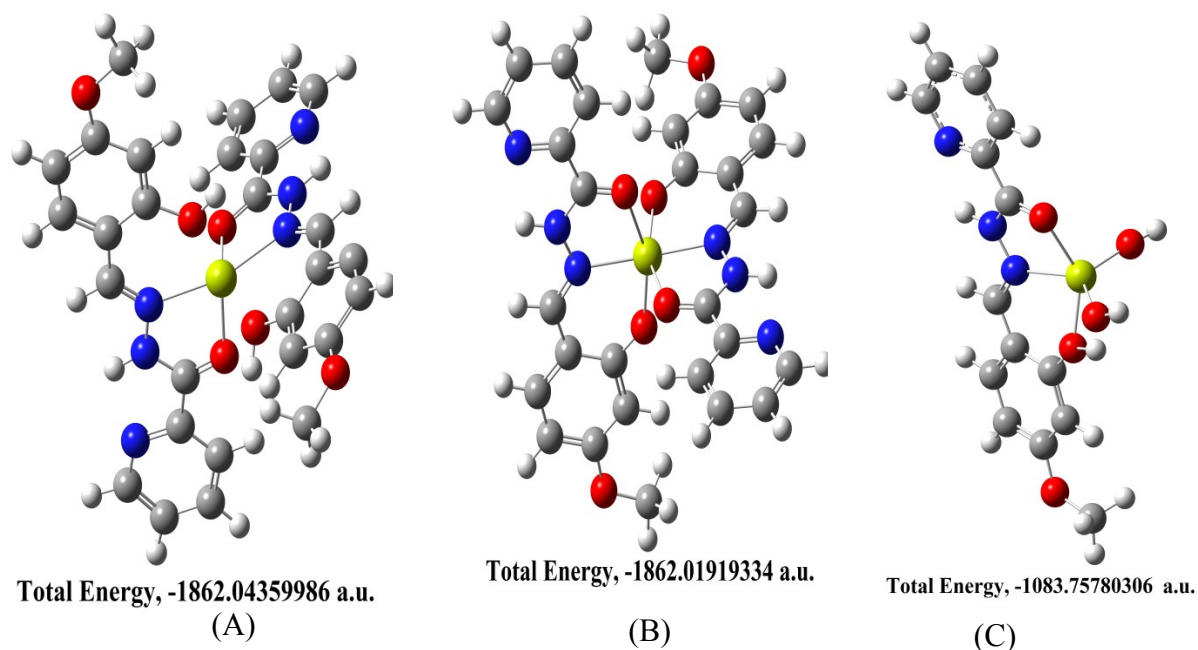

**Fig S23** DFT optimised structure with total energy of probable  $\text{Mg}^{2+}$  complex of **HVPh** (A) charged (+2); (B) Neutral; (C)  $\text{Mg}^{2+}$  Complex as **HVPh-Al**.

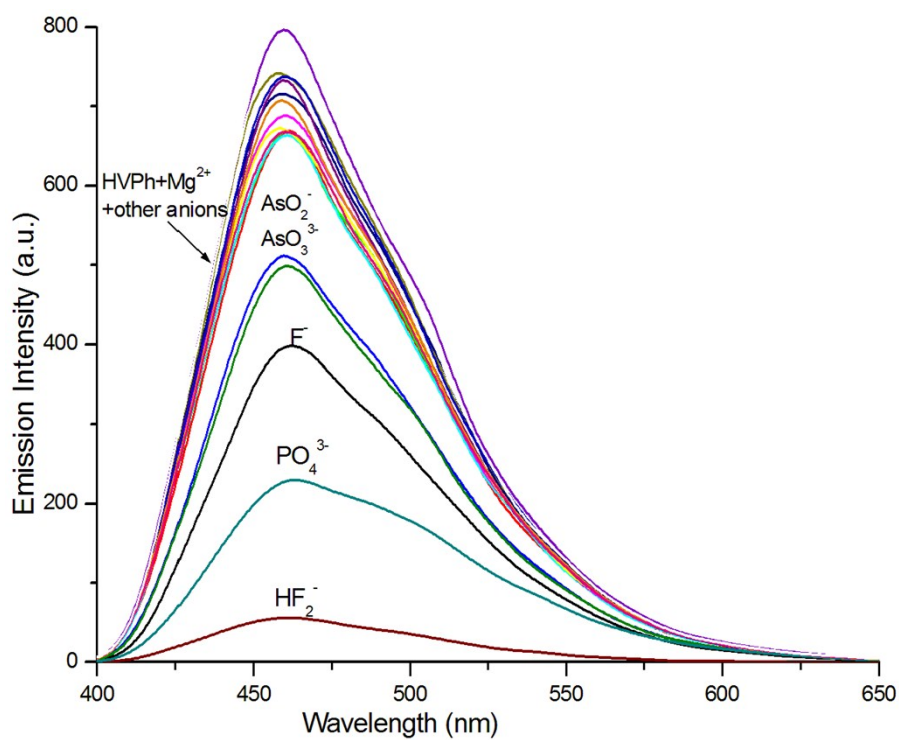

**Fig S24** Interaction of **HVPh-Al**<sup>3+</sup> with various anions in Fluorescence spectroscopy

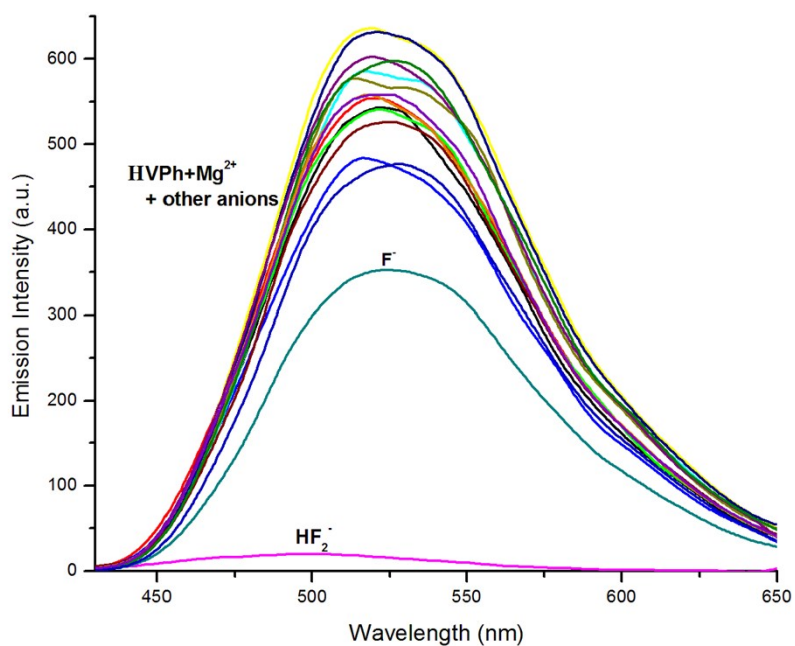

**Fig S25** Interaction of **HVPPh-Mg<sup>2+</sup>** with various anions in Fluorescence spectroscopy.

Anions are  $\text{S}_2\text{O}_3^{2-}$  ( $\text{Na}_2\text{S}_2\text{O}_3, 5\text{H}_2\text{O}$ ),  $\text{SCN}^-$  ( $\text{NH}_4\text{SCN}$ ),  $\text{PO}_4^{3-}$  ( $\text{K}_3\text{PO}_4, \text{H}_2\text{O}$ ),  $\text{OAc}^-$  ( $\text{NaOAc}, 3\text{H}_2\text{O}$ ),  $\text{ClO}_4^-$  ( $\text{NaClO}_4$ ),  $\text{SO}_4^{2-}$  ( $\text{Na}_2\text{SO}_4$ ),  $\text{HSO}_4^-$  ( $\text{NaHSO}_4$ ),  $\text{Cl}^-$  ( $\text{NaCl}$ ),  $\text{F}^-$  ( $\text{NaF}$ ),  $\text{HF}_2^-$  ( $\text{NH}_4\text{HF}_2$ ),  $\text{NO}_3^-$  ( $\text{KNO}_3$ ),  $\text{Br}^-$  ( $\text{KBr}$ ),  $\text{NO}_2^-$  ( $\text{NaNO}_2$ ),  $\text{N}_3^-$  ( $\text{NaN}_3$ ),  $\text{AsO}_4^{3-}$  ( $\text{Na}_3\text{AsO}_4$ ),  $\text{AsO}_2^-$  ( $\text{NaAsO}_2$ ).

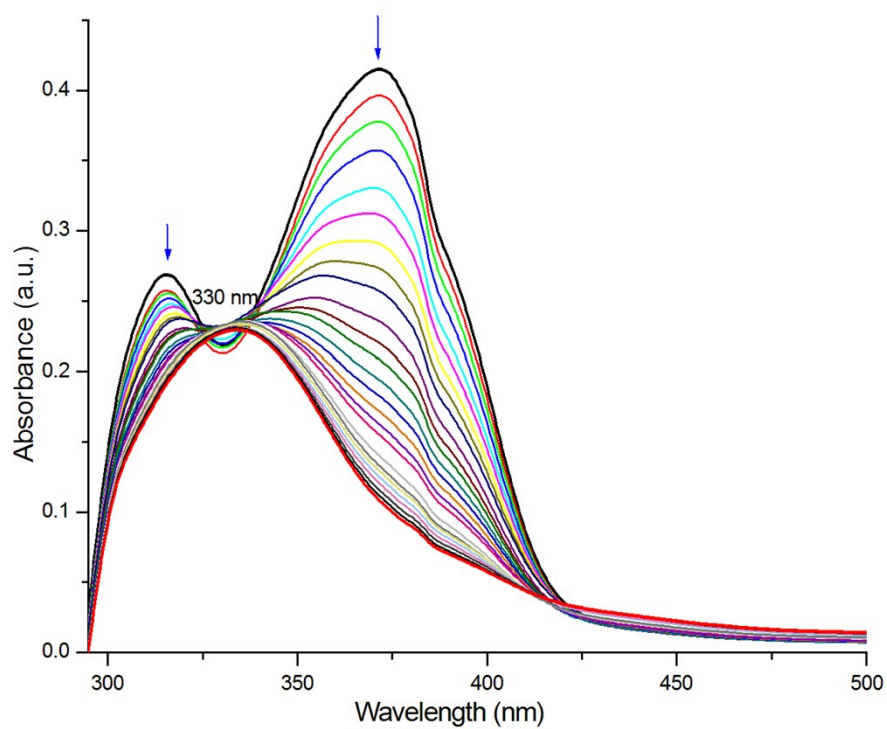

**Fig. S26.** Changes observed on incremental addition of HF<sub>2</sub><sup>-</sup> (0.003 ml × 10<sup>-3</sup> M each) to in situ formed 1:1 HVPPh-Al<sup>3+</sup> in H<sub>2</sub>O (pH 7.2, HEPES buffer) in (14) UV-vis spectra.

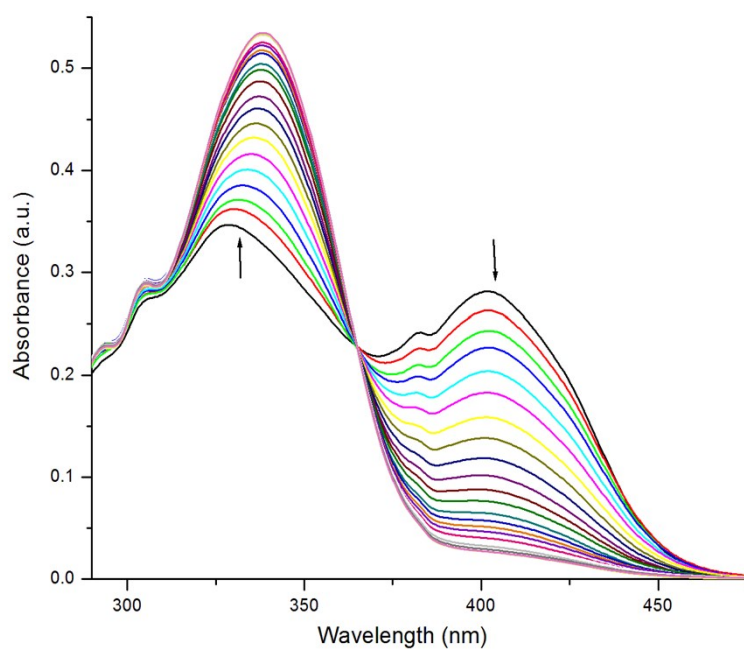

**Fig. S27.** Changes observed on incremental addition of HF<sub>2</sub><sup>-</sup> (0.003 ml × 10<sup>-3</sup> M each) to in situ formed HVPPh-Mg<sup>2+</sup> in DMSO (pH 7.2, HEPES buffer) in UV-vis spectra

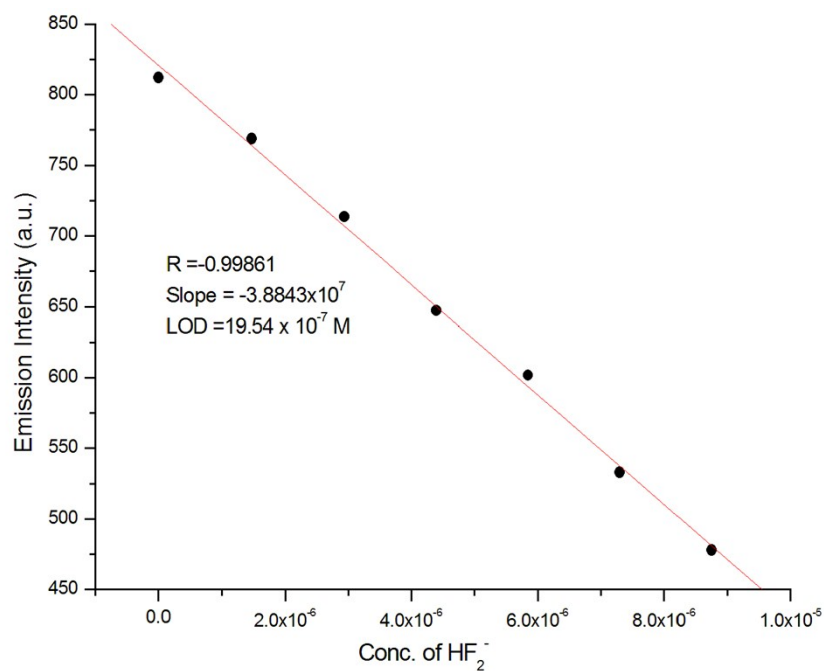

**Fig S28** Calculation of limit of detection (LOD) for  $\text{HF}_2^-$

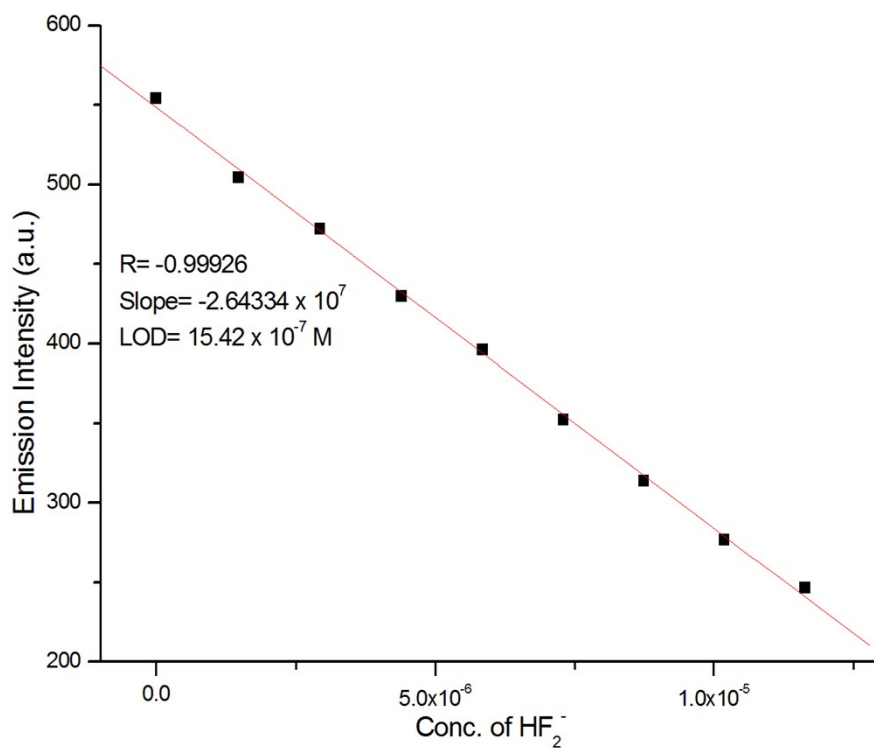

**Fig S29** Calculation of limit of detection (LOD) for  $\text{HF}_2^-$

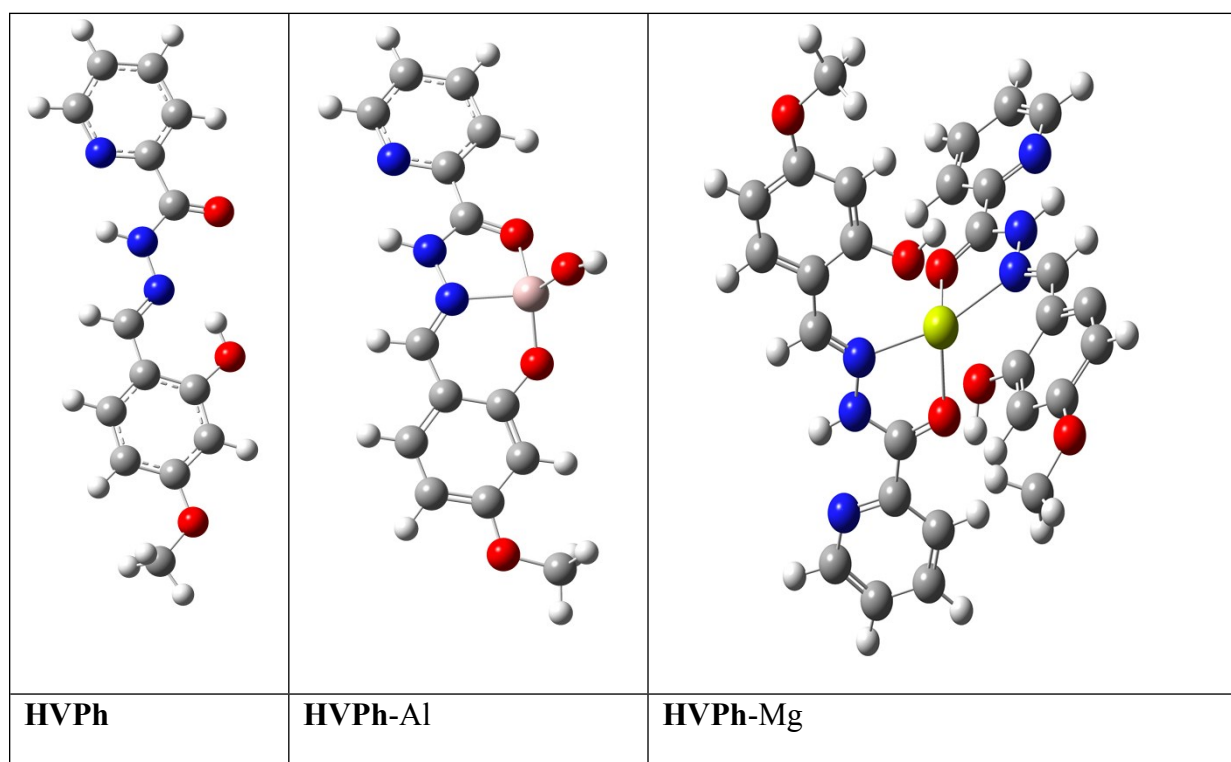

**Fig 30** DFT/B3LYP optimised structure of **HVPh**, **HVPh-Al** and **HVPh-Mg**

**Table S2** Contributions in MOs of **HVPh**

| MOs    | Energy (eV) | vanilin | picoyl hydrazide |
|--------|-------------|---------|------------------|
| LUMO+5 | 0.95        | 45      | 55               |
| LUMO+4 | 0.9         | 7       | 93               |
| LUMO+3 | -0.04       | 99      | 1                |
| LUMO+2 | -1.1        | 34      | 66               |
| LUMO+1 | -1.46       | 17      | 83               |
| LUMO   | -2.16       | 17      | 83               |
| HOMO   | -5.81       | 68      | 32               |
| HOMO-1 | -6.33       | 98      | 2                |



|        |       |    |    |
|--------|-------|----|----|
| HOMO-2 | -7.23 | 1  | 99 |
| HOMO-3 | -7.44 | 56 | 44 |
| HOMO-4 | -7.74 | 26 | 74 |
| HOMO-5 | -7.92 | 3  | 97 |

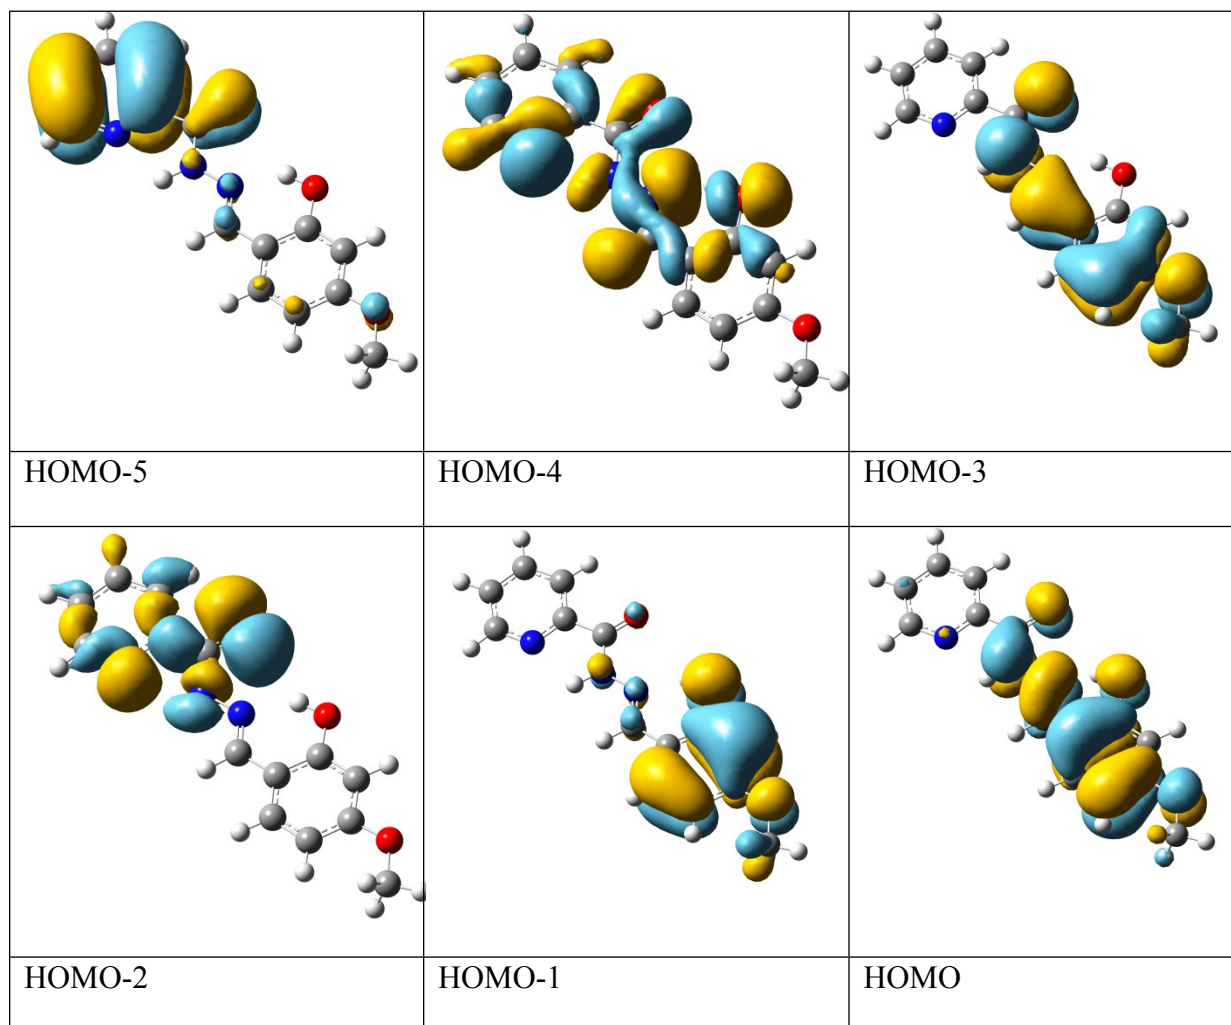

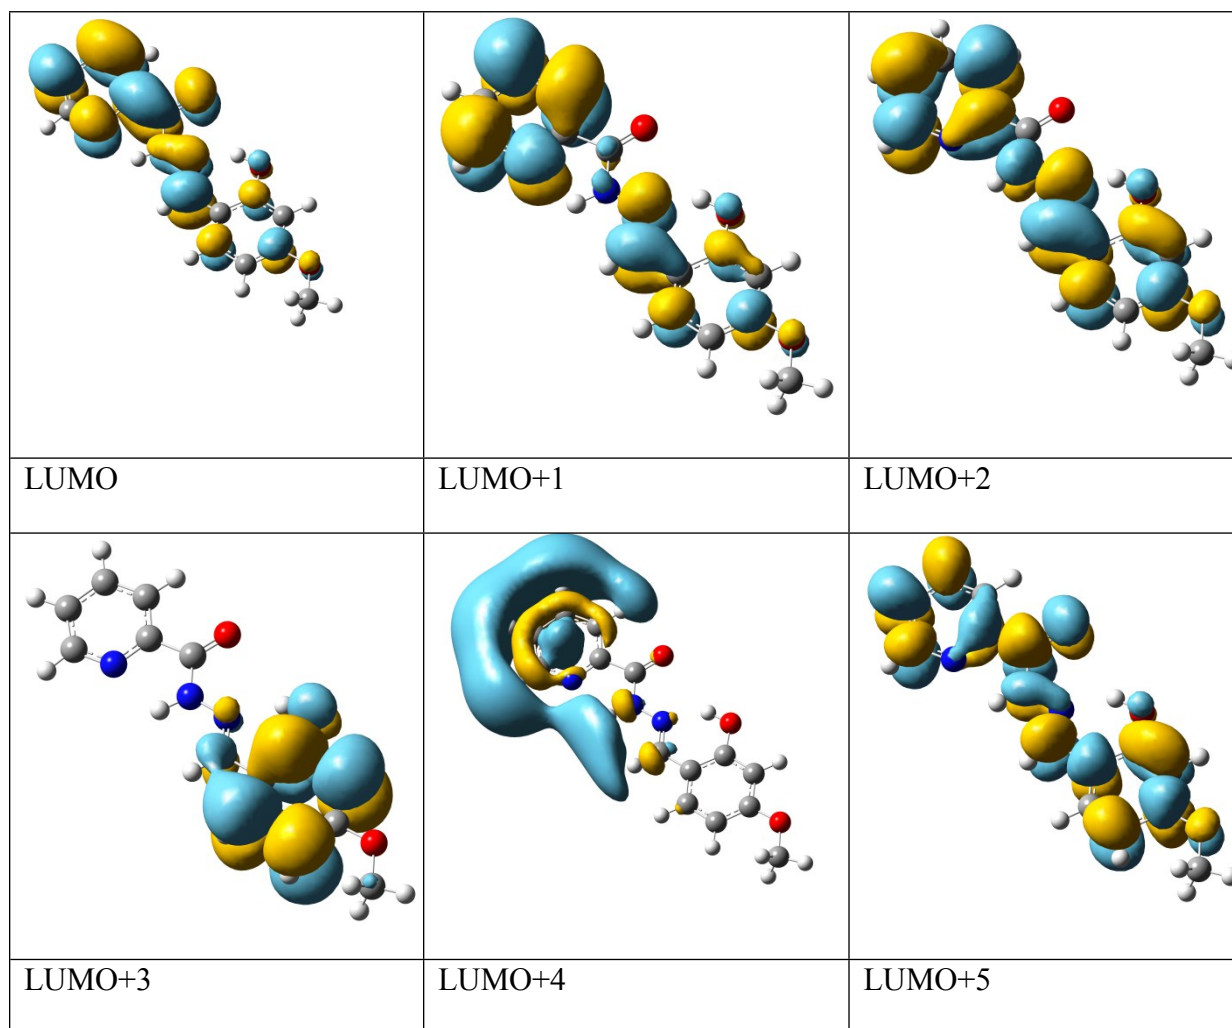

**Fig S31** Frontier molecular orbitals images of **HVPh**

**Table S3** Contributions in MOs of **HVPh-Al**

| MOs    | Energy | vanilin | picoyl hydrazide | Al | OH |
|--------|--------|---------|------------------|----|----|
| LUMO+5 | -2.89  | 12      | 65               | 22 | 1  |
| LUMO+4 | -2.99  | 4       | 22               | 73 | 1  |
| LUMO+3 | -3.43  | 98      | 0                | 2  | 0  |
| LUMO+2 | -4.37  | 0       | 100              | 0  | 0  |
| LUMO+1 | -5.4   | 42      | 58               | 1  | 0  |
| LUMO   | -6.18  | 40      | 59               | 1  | 0  |

|        |        |    |    |   |    |
|--------|--------|----|----|---|----|
| HOMO   | -9.55  | 75 | 23 | 1 | 0  |
| HOMO-1 | -9.92  | 97 | 1  | 1 | 1  |
| HOMO-2 | -10.97 | 3  | 97 | 0 | 0  |
| HOMO-3 | -11.0  | 17 | 80 | 0 | 3  |
| HOMO-4 | -11.33 | 7  | 10 | 5 | 79 |
| HOMO-5 | -11.42 | 19 | 55 | 1 | 25 |

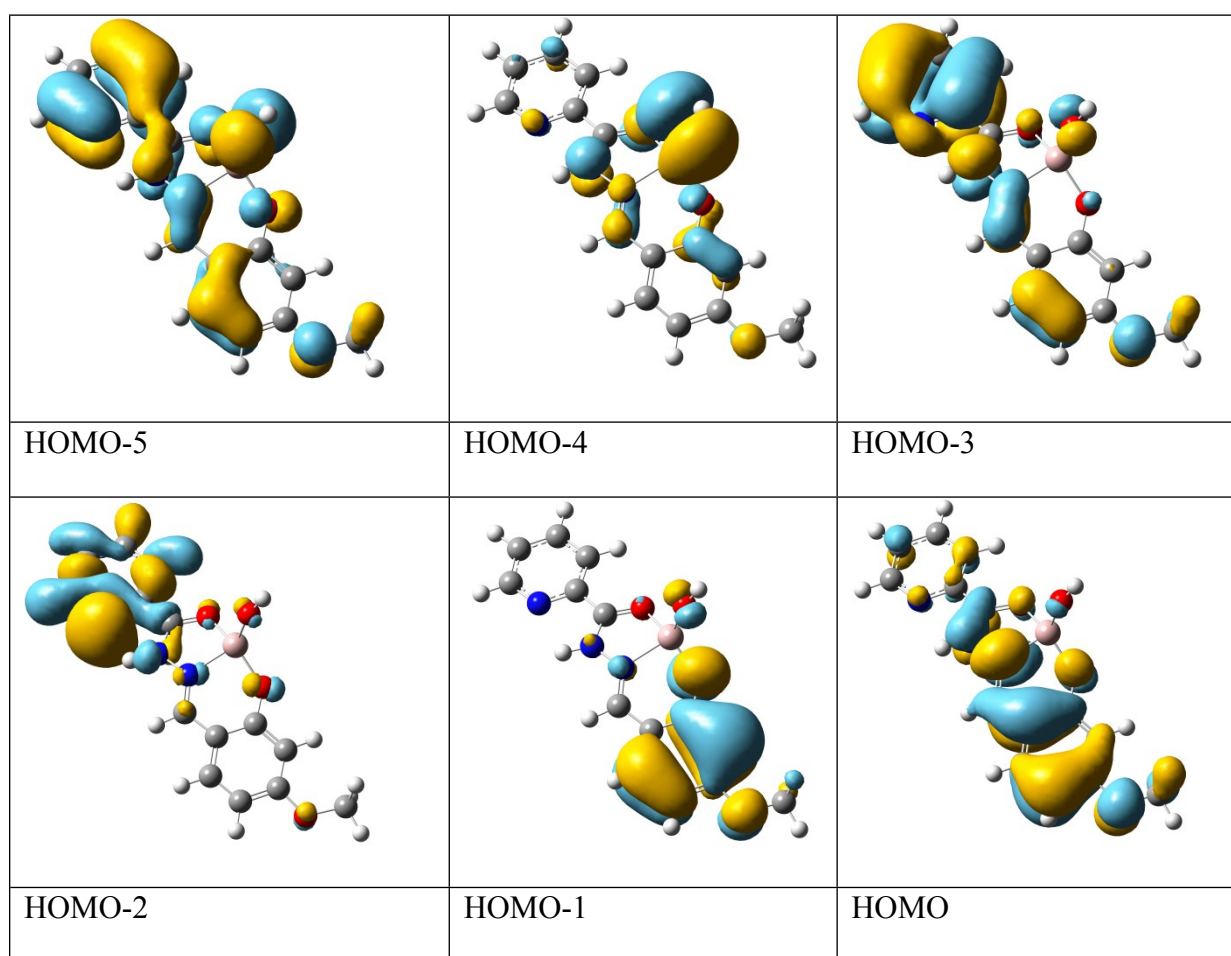

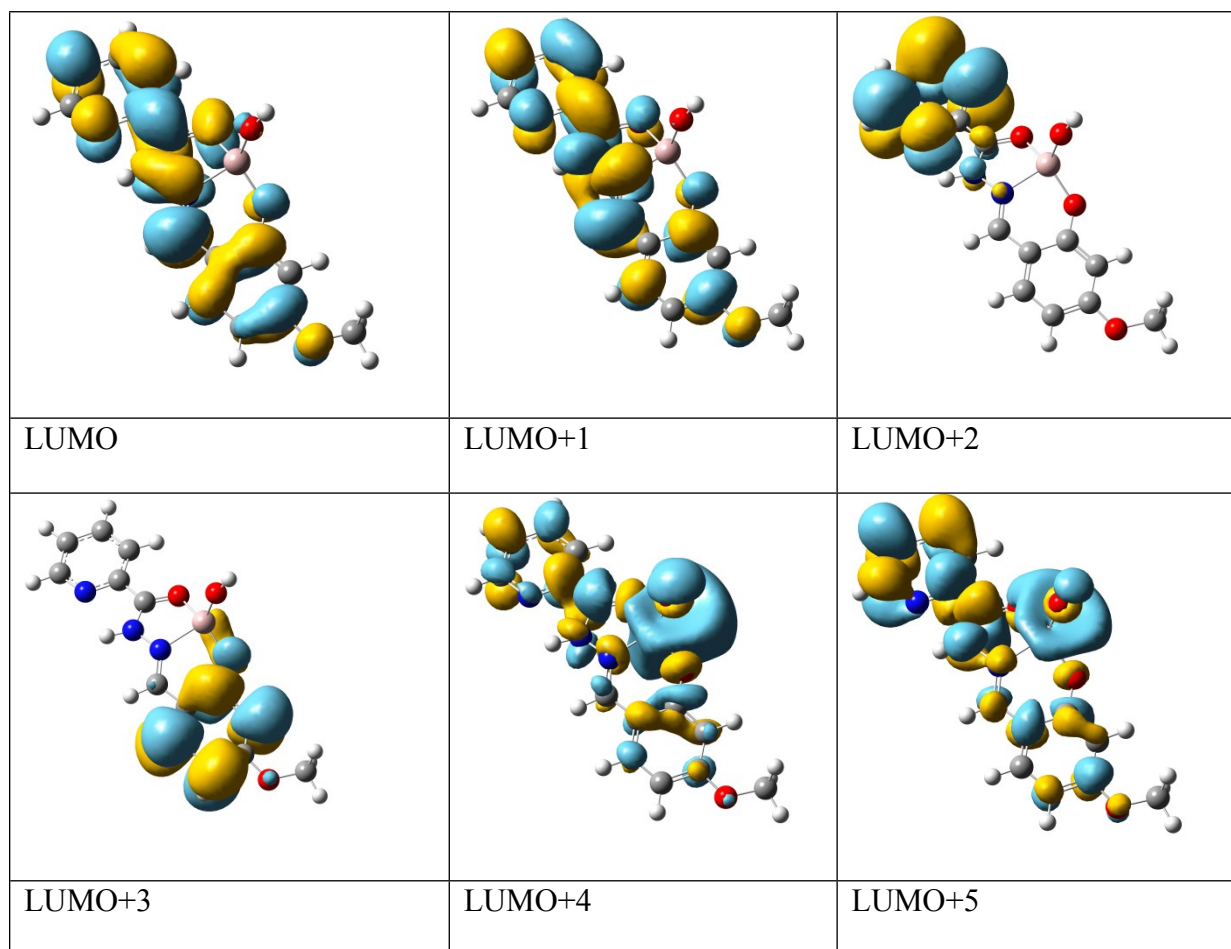

**Fig S32** Frontier molecular orbitals images of HVPPh-Al

**Table S4** Contributions in MOs of HVPPh-Mg

| MOs    | Energy (eV) | picoyl<br>hydrazide | vanilin | Mg |
|--------|-------------|---------------------|---------|----|
| LUMO+5 | -5.75       | 98                  | 2       | 0  |
| LUMO+4 | -5.85       | 3                   | 97      | 0  |

|        |        |    |    |   |
|--------|--------|----|----|---|
| LUMO+3 | -6.68  | 73 | 27 | 0 |
| LUMO+2 | -6.75  | 80 | 20 | 0 |
| LUMO+1 | -7.64  | 52 | 47 | 1 |
| LUMO   | -7.81  | 47 | 52 | 1 |
| HOMO   | -11.29 | 25 | 75 | 0 |
| HOMO-1 | -11.44 | 26 | 74 | 0 |
| HOMO-2 | -12.33 | 74 | 26 | 0 |
| HOMO-3 | -12.34 | 77 | 23 | 0 |
| HOMO-4 | -12.34 | 70 | 30 | 0 |
| HOMO-5 | -12.4  | 14 | 86 | 0 |

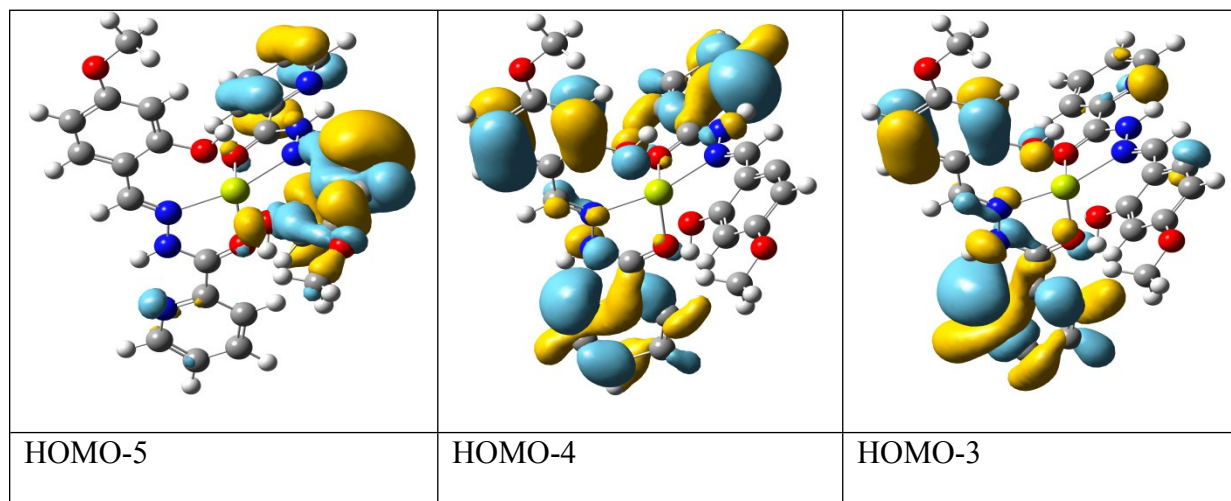

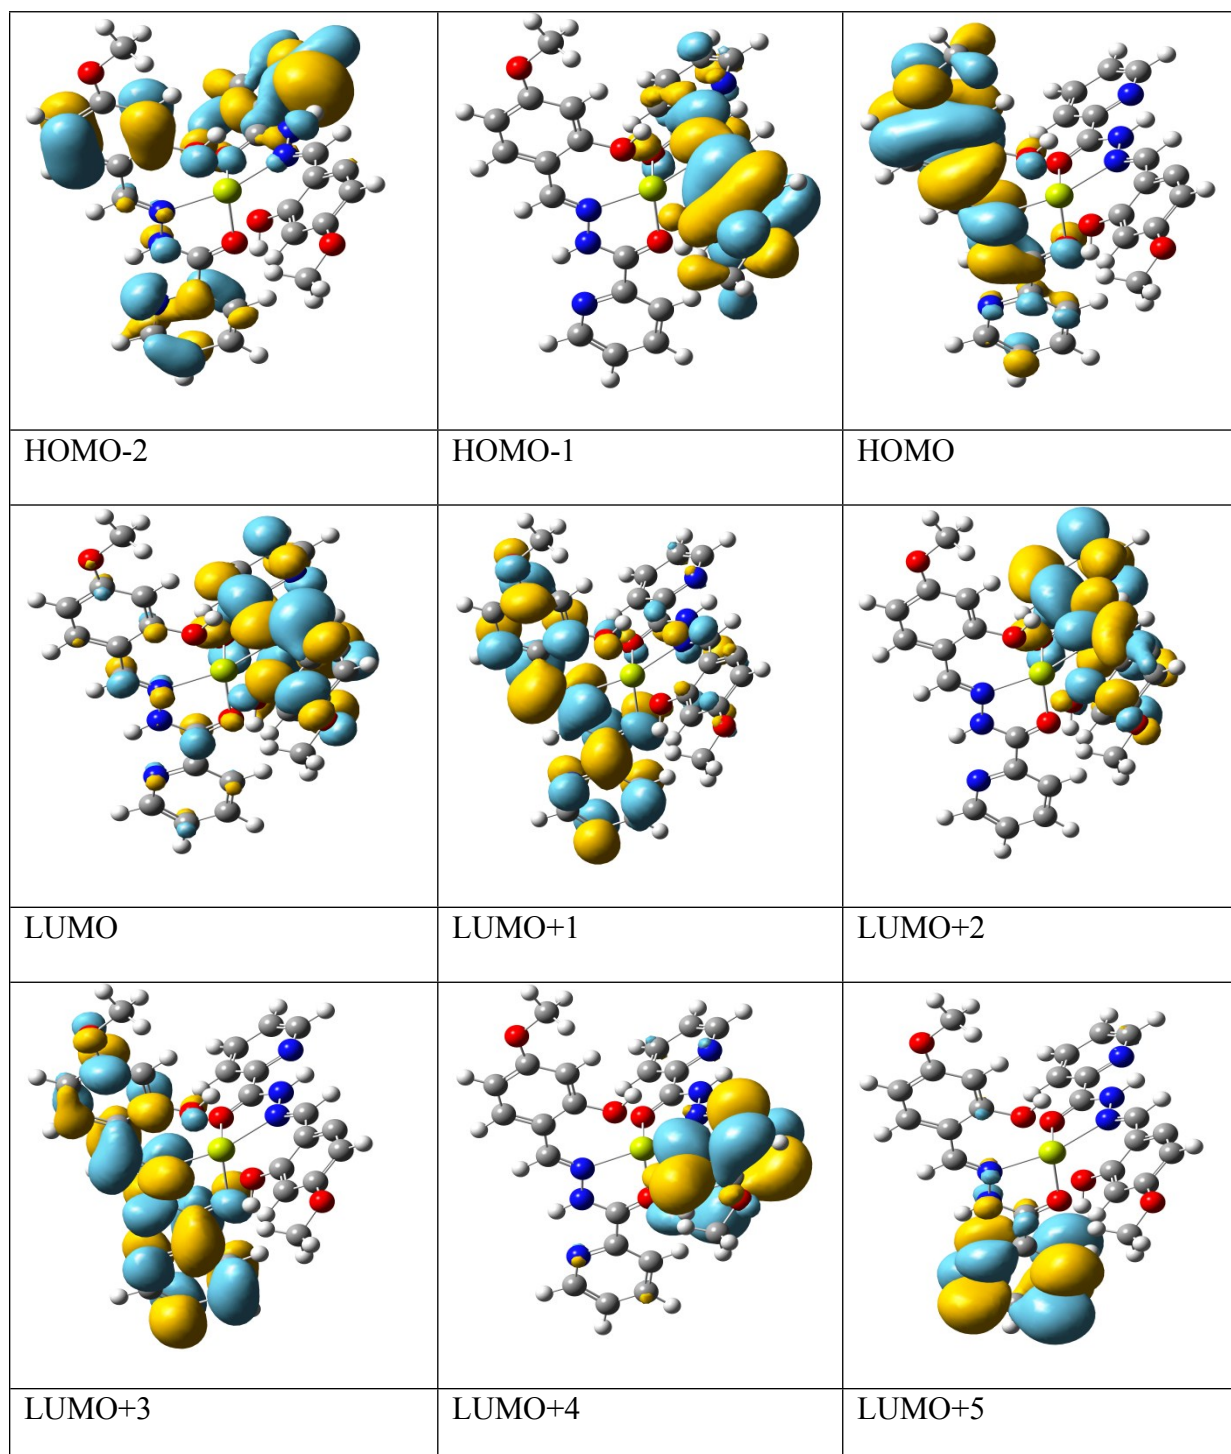

**Fig S33** Frontier molecular orbitals images of HVPh-Mg

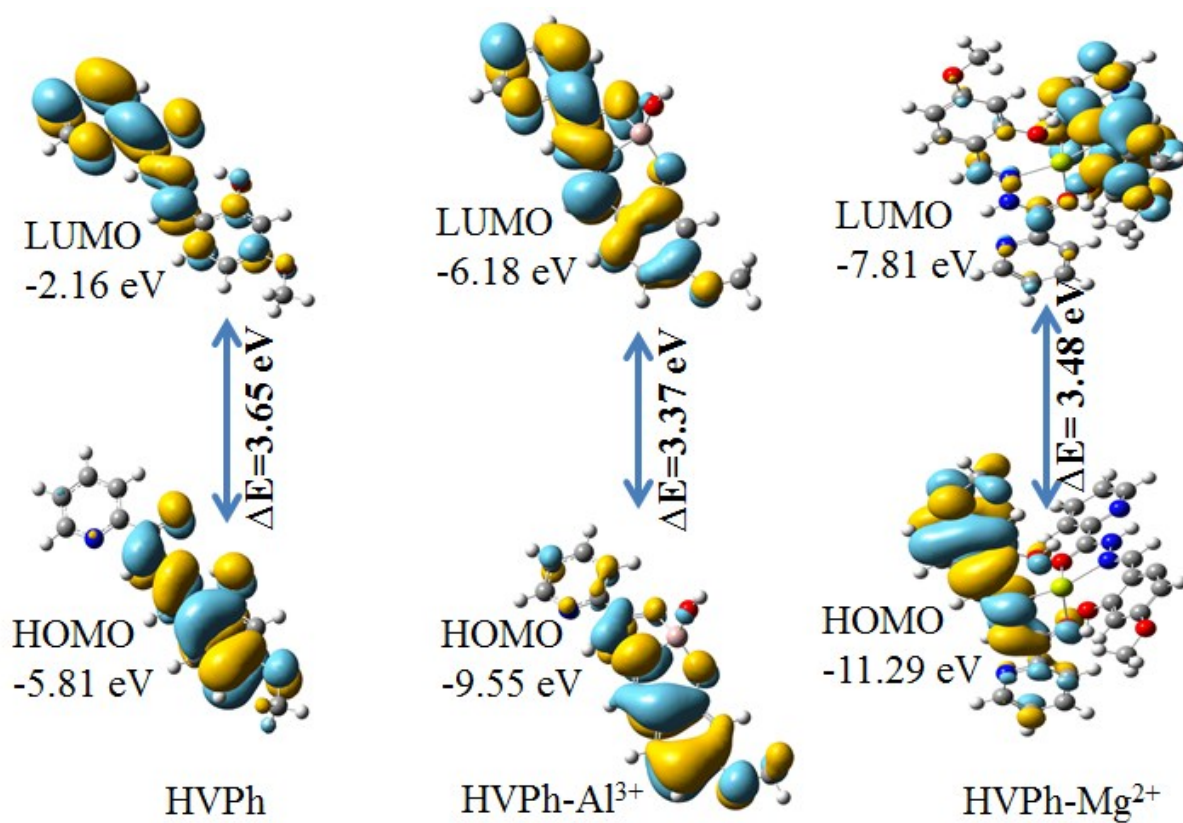

**Fig 34** Frontier molecular orbitals that represent band gap (HOMO-LUMO gap) of **HVPPh**, **HVPPh-Al** and **(HVPPh)<sub>2</sub>-Mg**.

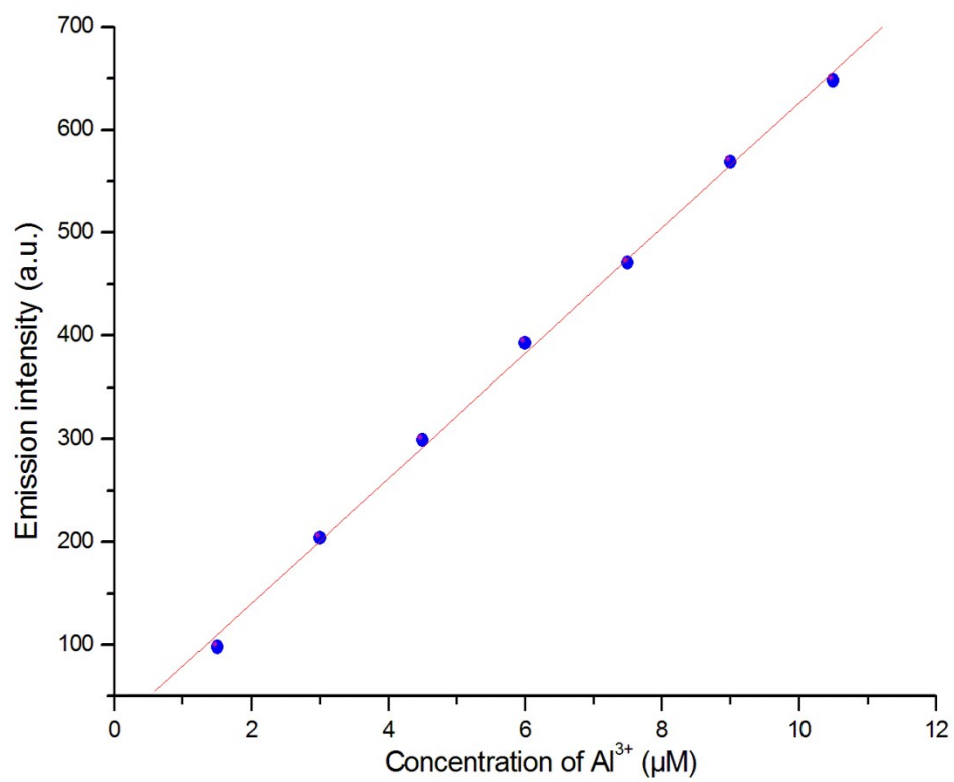

**Fig S35** Calibration plot for detection of  $\text{Al}^{3+}$  using fluorescence active probe **HVPh**.
